# Supplementary material for: Simultaneous determination of 114 pesticides in complex Chinese herbal medicine Fritillaria using ordered mesoporous carbon CMK-3 as a reversed-dispersive solid phase extraction sorbent
Source: PubMed Central journal article supplement (PMC8694350; doi:10.1039/d0ra07229j), 2021-01-20
Supplement: RA-011-D0RA07229J-s001.pdf [file RA-011-D0RA07229J-s001.pdf]

### Supplementary materials

#### Simultaneous determination of 114 pesticides in complex Chinese herbal medicine *Fritillaria* using ordered mesoporous carbon CMK-3 as a reversed-dispersive solid phase extraction sorbent

Tong Wu<sup>a</sup>, Peipei Qi<sup>b,c,d,1</sup>, Jiao Wang<sup>b,c,d</sup>, Zhiwei Wang<sup>b,c,d</sup>, Shanshan Di<sup>b,c,d</sup>, Hao Xu<sup>b,c,d</sup>, Huiyu Zhao<sup>b,c,d</sup>, Changshan Zhao<sup>a,\*</sup>, Xinquan Wang<sup>b,c,d,\*</sup>

<sup>a</sup> College of Agriculture, Northeast Agricultural University, Harbin, 150030, P. R. China

<sup>b</sup> State Key Laboratory for Managing Biotic and Chemical Threats to the Quality and Safety of Agro-products, Institute of Quality and Standard of Agro-products, Zhejiang Academy of Agricultural Sciences, Hangzhou 310021, P. R. China

<sup>c</sup> Agricultural Ministry Key Laboratory for Pesticide Residue Detection, Hangzhou 310021, P. R. China

<sup>d</sup> Key Laboratory of Detection for Pesticide Residue and Control of Zhejiang, Hangzhou 310021, P. R. China

\* Corresponding author:

#### Professor Xinquan Wang

Postal address: No. 198 Shiqiao Road, Hangzhou 310021, P. R. China

Tel: + 86 571 86419051; E-mail address: wangxinquan212@163.com

#### Professor Changshan Zhao

Postal address: No. 600 Changjiang Road, Harbin 150030, P. R. China

Tel: + 86451 55191775; Email address: csz-hlj@sohu.com

<sup>1</sup> Peipei Qi is the co-first author owing to the equal contribution.

**Table S1 Parameters for 114 pesticides analysis by LC-MS/MS.**

| Pesticides          | Parent ion (m/z) | Product ion (m/z) | Q1 prerod (V) | Collision energy (eV) | Q3 prerod (V) |
|---------------------|------------------|-------------------|---------------|-----------------------|---------------|
| Acephate            | 184.20           | 143.00;95.00      | -20;-20       | -8;-23                | -15;-16       |
| Acetamiprid         | 223.10           | 126.05;56.10      | -30;-30       | -22;-15               | -30;-23       |
| Alachlor            | 270.10           | 238.05;162.15     | -30;-30       | -10;-19               | -26;-30       |
| Atrazine            | 216.10           | 174.05;96.05      | -30;-30       | -17;-25               | -18;-17       |
| Avermectin          | 895.50           | 449.30;751.50     | -32;-32       | -46;-46               | -32;-22       |
| Azaconazole         | 300.00           | 159.00;231.00     | -15;-15       | -27;-17               | -29;-23       |
| Azamethiphos        | 325.00           | 183.10;112.10     | -16;-16       | -16;-38               | -19;-20       |
| Azoxystrobin        | 404.10           | 372.05;329.00     | -30;-30       | -14;-31               | -26;-23       |
| Benalaxyl           | 326.20           | 148.20;294.10     | -16;-16       | -21;-11               | -15;-20       |
| Bendiocarb          | 224.10           | 167.05;109.05     | -25;-25       | -9;-19                | -18;-20       |
| Bitertanol          | 338.20           | 269.15;99.10      | -17;-17       | -9;-15                | -29;-18       |
| Bromuconazole       | 377.90           | 158.90;70.00      | -19;-19       | -28;-23               | -30;-30       |
| Buprofezin          | 306.10           | 201.10;116.10     | -30;-30       | -11;-16               | -22;-12       |
| Cadusafos           | 271.10           | 159.00;97.00      | -30;-30       | -14;-37               | -29;-18       |
| Carbendazim         | 192.05           | 160.05;132.05     | -30;-30       | -17;-30               | -30;-24       |
| Carbofuran          | 222.10           | 165.10;123.10     | -25;-25       | -11;-21               | -17;-22       |
| Chlorantraniliprole | 484.00           | 452.90;285.85     | -24;-24       | -19;-16               | -30;-30       |
| Chlorpyrifos        | 351.90           | 199.90;96.95      | -27;-27       | -18;-33               | -21;-18       |
| Chlortoluron        | 213.10           | 72.00;140.10      | -23;-24       | -21;-23               | -28;-24       |
| Clothianidin        | 250.00           | 169.10;132.00     | -29;-29       | -12;-14               | -17;-24       |

|                      |        |               |         |         |         |
|----------------------|--------|---------------|---------|---------|---------|
| Coumaphos            | 363.00 | 227.00;307.10 | -18;-18 | -26;-18 | -23;-21 |
| Cyanofenphos         | 304.10 | 77.25;122.20  | -20;-11 | -60;-19 | -16;-25 |
| Cyazofamid           | 325.00 | 108.05;261.10 | -23;-23 | -12;-10 | -21;-28 |
| Cyproconazole        | 292.10 | 70.05;125.05  | -30;-30 | -20;-30 | -27;-22 |
| Dicrotophos          | 238.00 | 112.10;193.00 | -12;-12 | -12;-9  | -11;-20 |
| Difenoconazole       | 406.10 | 251.00;337.05 | -30;-30 | -25;-17 | -27;-24 |
| Dimethoate           | 230.00 | 198.95;125.00 | -26;-26 | -9;-22  | -21;-22 |
| Dimethomorph         | 388.10 | 301.00;165.05 | -19;-19 | -20;-34 | -21;-30 |
| Dimethyl phthalate   | 195.10 | 163.30;77.25  | -13;-13 | -10;-31 | -19;-15 |
| Diniconazole         | 326.10 | 70.00;159.00  | -16;-16 | -25;-30 | -28;-30 |
| Dinotefuran          | 203.10 | 129.10;113.10 | -22;-22 | -12;-10 | -22;-12 |
| Emamectin Benzoate   | 886.40 | 158.30;82.25  | -26;-26 | -40;-70 | -12;-17 |
| Epoxiconazol         | 330.10 | 121.20;141.10 | -17;-17 | -21;-18 | -22;-25 |
| Ethiofencarb         | 226.10 | 107.05;164.05 | -26;-26 | -15;-8  | -19;-30 |
| Ethofenprox          | 394.00 | 177.10;106.95 | -19;-19 | -17;-40 | -20;-19 |
| Etoxazole            | 360.00 | 141.00;113.00 | -15;-15 | -30;-35 | -15;-15 |
| Fenamiphos           | 304.10 | 217.10;202.00 | -15;-15 | -22;-36 | -23;-21 |
| Fenamiphos sulfoxide | 319.80 | 233.00;292.05 | -30;-30 | -23;-16 | -26;-21 |
| Fenbuconazole        | 336.90 | 125.05;70.00  | -26;-26 | -27;-20 | -25;-28 |
| Fenpropathrin        | 350.30 | 125.20;97.20  | -24;-25 | -18;-31 | -12;-17 |
| Fipronil             | 435.00 | 330.00;250.00 | 10;10   | 16;28   | 21;24   |
| Fipronil-sulfone     | 450.90 | 415.00;282.25 | 22;22   | 16;27   | 10;12   |
| Fludioxonil          | 247.10 | 180.20;126.15 | 17;17   | 29;32   | 30;22   |

|                      |        |               |         |         |         |
|----------------------|--------|---------------|---------|---------|---------|
| Fluopyram            | 397.10 | 173.10;208.10 | -28;-15 | -28;-22 | -24;-21 |
| Fluoxastrobin        | 458.90 | 427.20;188.30 | -17;-22 | -20;-36 | -17;-14 |
| Flusilazole          | 316.10 | 247.10;165.10 | -30;-30 | -18;-29 | -27;-30 |
| Flutolanil           | 324.10 | 262.10;242.00 | -16;-16 | -18;-26 | -27;-25 |
| Flutriafol           | 302.10 | 123.00;109.00 | -15;-15 | -28;-31 | -22;-19 |
| Hexaconazole         | 314.10 | 70.20;159.15  | -15;-15 | -21;-29 | -28;-30 |
| Hexaflumuron         | 459.00 | 438.90;175.10 | 16;16   | 12;36   | 29;29   |
| Hexazinone           | 253.15 | 171.10;85.10  | -30;-30 | -15;-31 | -18;-15 |
| 3-Hydroxy-carbofuran | 238.10 | 163.10;181.20 | -27;-27 | -14;-10 | -17;-19 |
| Imazalil             | 297.00 | 159.00;200.00 | -15;-15 | -23;-19 | -15;-15 |
| Imidacloprid         | 256.05 | 175.10;209.05 | -29;-29 | -17;-14 | -18;-22 |
| Indoxacarb           | 528.10 | 249.10;292.95 | -26;-26 | -17;-15 | -27;-21 |
| Ipconazole           | 334.00 | 70.30;125.20  | -23;-23 | -23;-47 | -14;-14 |
| Isoprocarb           | 194.10 | 95.00;137.10  | -21;-22 | -14;-10 | -17;-14 |
| Kresoxim-methyl      | 314.00 | 222.30;267.30 | -15;-21 | -17;-8  | -12;-14 |
| Lufenuron            | 509.00 | 326.00;339.00 | 24;24   | 19;12   | 15;22   |
| Machette             | 312.20 | 238.10;147.20 | -15;-15 | -12;-36 | -26;-28 |
| Malaoxon             | 314.90 | 98.95;127.00  | -15;-15 | -24;-13 | -19;-23 |
| Malathion            | 331.00 | 127.05;99.00  | -17;-17 | -12;-23 | -13;-18 |
| Mepronil             | 270.15 | 119.05;228.05 | -30;-30 | -25;-18 | -30;-30 |
| Metalaxyl            | 280.10 | 220.20;192.20 | -30;-30 | -13;-18 | -24;-20 |
| Metalaxyl-M          | 280.10 | 220.15;248.10 | -30;-30 | -13;-10 | -24;-27 |
| Methidathion         | 303.00 | 145.00;85.10  | -21;-21 | -8;-22  | -15;-30 |

|                    |        |               |         |         |         |
|--------------------|--------|---------------|---------|---------|---------|
| Methomyl           | 163.05 | 88.00;106.05  | -18;-18 | -8;-10  | -16;-19 |
| Methoprene         | 311.10 | 117.30;119.15 | -22;-15 | -52;-31 | -14;-22 |
| Methoxyfenozide    | 369.20 | 149.10;313.10 | -18;-18 | -16;-8  | -16;-22 |
| Mevinphos          | 225.00 | 127.05;193.05 | -25;-25 | -17;-8  | -23;-20 |
| Monocrotophos      | 224.10 | 127.05;193.00 | -25;-25 | -15;-8  | -13;-20 |
| Myclobutanil       | 289.10 | 70.05;125.05  | -30;-30 | -21;-30 | -28;-22 |
| Omethoate          | 214.10 | 183.00;155.00 | -23;-23 | -10;-14 | -19;-28 |
| Paclobutrazol      | 294.10 | 70.05;125.05  | -15;-15 | -21;-40 | -28;-22 |
| Penconazole        | 284.10 | 159.00;70.00  | -14;-14 | -27;-17 | -30;-27 |
| Phenthoate         | 321.00 | 79.10;246.95  | -23;-23 | -41;-11 | -30;-17 |
| Phorate            | 261.00 | 75.00;143.00  | -29;-29 | -10;-18 | -30;-15 |
| Phorate sulfone    | 293.00 | 171.05;115.00 | -22;-22 | -9;-24  | -19;-20 |
| Phosalone          | 368.00 | 182.05;111.00 | -30;-30 | -14;-39 | -19;-20 |
| Phosfolan          | 256.00 | 140.00;228.00 | -13;-13 | -24;-12 | -26;-25 |
| Phosphamidon       | 300.00 | 174.05;127.00 | -15;-15 | -12;-29 | -17;-22 |
| Piperonyl butoxide | 356.30 | 177.10;119.00 | -24;-24 | -13;-37 | -19;-22 |
| Pirimicarb         | 239.15 | 72.05;182.15  | -30;-30 | -25;-19 | -30;-30 |
| Pirimiphos-methyl  | 306.05 | 108.10;95.00  | -30;-30 | -31;-29 | -19;-17 |
| Prochloraz         | 376.00 | 308.00;266.00 | -19;-19 | -11;-17 | -21;-29 |
| Profenofos         | 372.90 | 302.80;345.00 | -18;-18 | -19;-12 | -30;-24 |
| Propamocarb        | 189.20 | 102.05;144.05 | -30;-30 | -20;-12 | -23;-15 |
| Propiconazole      | 342.05 | 159.10;205.10 | -17;-17 | -30;-18 | -29;-21 |
| Pyraclostrobin     | 388.00 | 163.30;164.35 | -11;-19 | -24;-18 | -18;-12 |

|                    |        |               |         |         |         |
|--------------------|--------|---------------|---------|---------|---------|
| Pyridaben          | 365.10 | 309.05;147.10 | -18;-18 | -12;-25 | -22;-27 |
| Pyridafenthion     | 341.10 | 189.10;205.10 | -17;-23 | -22;-22 | -20;-22 |
| Pyrimitate         | 334.10 | 198.05;182.10 | -25;-25 | -22;-22 | -21;-19 |
| Pyrisoxazole       | 289.00 | 151.00;120.00 | -15;-15 | -20;-28 | -15;-15 |
| Simeconazole       | 294.10 | 70.05;135.05  | -15;-15 | -21;-21 | -28;-24 |
| Spirodiclofen      | 411.10 | 71.20;313.05  | -21;-21 | -16;-11 | -28;-22 |
| Sulfotep           | 323.00 | 115.00;171.10 | -16;-16 | -31;-15 | -20;-18 |
| Sulprofos          | 322.90 | 219.05;139.25 | -16;-16 | -16;-30 | -16;-15 |
| Tebuconazole       | 308.10 | 70.10;125.00  | -22;-22 | -22;-38 | -27;-23 |
| Tebufenozide       | 353.20 | 133.10;297.10 | -18;-18 | -20;-8  | -24;-15 |
| Tebufenpyrad       | 334.20 | 117.05;145.00 | -16;-16 | -38;-27 | -21;-26 |
| Temephos           | 467.00 | 419.00;341.00 | -23;-23 | -19;-32 | -30;-24 |
| Terbufos           | 289.00 | 103.15;57.10  | -14;-14 | -9;-24  | -18;-24 |
| Tetrachlorvinphos  | 364.90 | 127.05;203.90 | -27;-27 | -14;-38 | -13;-21 |
| Tetraconazole      | 372.00 | 159.05;70.20  | -27;-27 | -31;-24 | -29;-27 |
| Thiacloprid        | 253.00 | 126.05;99.00  | -28;-28 | -20;-43 | -22;-17 |
| Thiamethoxam       | 292.00 | 211.10;181.10 | -30;-30 | -11;-23 | -22;-19 |
| Thiophanate-methyl | 343.05 | 151.15;311.05 | -17;-17 | -20;-10 | -16;-22 |
| Tolfenpyrad        | 384.10 | 197.10;154.05 | -10;-10 | -25;-41 | -12;-29 |
| Triadimefon        | 294.10 | 69.15;197.05  | -21;-21 | -22;-15 | -26;-21 |
| Triadimenol        | 296.10 | 70.05;99.15   | -15;-15 | -11;-15 | -29;-17 |
| Trifloxystrobin    | 409.10 | 186.05;145.00 | -20;-20 | -18;-44 | -20;-26 |
| Triticonazole      | 318.10 | 70.05;125.05  | -16;-16 | -21;-39 | -28;-23 |

|             |        |               |         |         |         |
|-------------|--------|---------------|---------|---------|---------|
| Uniconazole | 292.10 | 69.84;124.85  | -15;-15 | -35;-35 | -15;-15 |
| Vitavax     | 236.05 | 143.00;124.00 | -27;-27 | -14;-20 | -15;-22 |

---

**Table S2 The linearity, LOD and ME of each pesticide in FT.**

| Pesticides    | $^1y=a x+b$                | R      | Linear range,<br>$\mu\text{g L}^{-1}$ | LOD,<br>$\mu\text{g L}^{-1}$ | ME   |
|---------------|----------------------------|--------|---------------------------------------|------------------------------|------|
| Acephate      | $^2y = 67444.2 x + 165489$ | 0.9995 | 1-250                                 | 0.11                         | 0.71 |
|               | $^3y = 95454.7 x + 126007$ | 0.9998 | 1-250                                 |                              |      |
| Acetamiprid   | $y = 59014.0 x + 183931$   | 0.9990 | 1-250                                 | 0.06                         | 0.27 |
|               | $y = 216310 x + 859034$    | 0.9996 | 1-250                                 |                              |      |
| Alachlor      | $y = 1158360 x + 2973800$  | 0.9974 | 1-100                                 | 0.90                         | 0.88 |
|               | $y = 1319150 x + 3664510$  | 0.9956 | 1-100                                 |                              |      |
| Atrazine      | $y = 71845.0 x + 333514$   | 0.9989 | 1-250                                 | 0.45                         | 0.44 |
|               | $y = 163204 x + 1200030$   | 0.9981 | 1-250                                 |                              |      |
| Avermectin    | $y = 12432.4 x + 16595.4$  | 0.9986 | 1-250                                 | 1.39                         | 0.79 |
|               | $y = 15804.3 x + 78893.4$  | 0.9978 | 1-250                                 |                              |      |
| Azaconazole   | $y = 165130 x + 593435$    | 0.9996 | 1-250                                 | 0.73                         | 0.63 |
|               | $y = 264001 x + 1277940$   | 0.9993 | 1-250                                 |                              |      |
| Azamethiphos  | $y = 21863.4 x + 52802.6$  | 0.9993 | 1-250                                 | 0.54                         | 0.25 |
|               | $y = 88694.2 x - 180974$   | 0.9985 | 1-250                                 |                              |      |
| Azoxystrobin  | $y = 513660 x + 1022300$   | 0.9995 | 1-100                                 | 1.43                         | 0.68 |
|               | $y = 758953 x + 1340200$   | 0.9989 | 1-100                                 |                              |      |
| Benalaxyl     | $y = 127414 x + 890519$    | 0.9972 | 1-250                                 | 0.32                         | 0.85 |
|               | $y = 149996 x + 734635$    | 0.9988 | 1-250                                 |                              |      |
| Bendiocarb    | $y = 35610.4 x + 145697$   | 0.9978 | 1-250                                 | 0.72                         | 0.36 |
|               | $y = 98646.2 x + 217493$   | 0.9996 | 1-250                                 |                              |      |
| Bitertanol    | $y = 10484.9 x + 68699.1$  | 0.9989 | 1-250                                 | 1.42                         | 0.96 |
|               | $y = 10941.0 x + 27922.0$  | 0.9991 | 1-250                                 |                              |      |
| Bromuconazole | $y = 24847.2 x + 86690.0$  | 0.9990 | 1-250                                 | 3.31                         | 0.70 |
|               | $y = 35549.1 x + 205283$   | 0.9991 | 1-250                                 |                              |      |
| Buprofezin    | $y = 297695 x + 2088270$   | 0.9959 | 1-250                                 | 0.04                         | 1.01 |



|                     |                           |        |       |      |      |
|---------------------|---------------------------|--------|-------|------|------|
|                     | $y = 296179 x + 1739250$  | 0.9981 | 1-250 |      |      |
| Cadusafos           | $y = 219799 x + 882700$   | 0.9987 | 1-250 | 0.83 | 0.72 |
|                     | $y = 305975 x + 1489500$  | 0.9990 | 1-250 |      |      |
| Carbendazim         | $y = 28169.9 x + 1723470$ | 0.9947 | 1-250 | 0.35 | 0.09 |
|                     | $y = 320186 x + 1825120$  | 0.9988 | 1-250 |      |      |
| Carbofuran          | $y = 76307.5 x + 291203$  | 0.9991 | 1-250 | 0.21 | 0.24 |
|                     | $y = 315291 x + 1980730$  | 0.9990 | 1-250 |      |      |
| Chlorantraniliprole | $y = 33455.9 x + 206559$  | 0.9977 | 1-250 | 0.59 | 0.55 |
|                     | $y = 60806.5 x + 374502$  | 0.9984 | 1-250 |      |      |
| Chlorpyrifos        | $y = 1120950 x + 1247400$ | 0.9997 | 1-100 | 0.17 | 0.96 |
|                     | $y = 1170180 x + 1250410$ | 0.9991 | 1-100 |      |      |
| Chlortoluron        | $y = 44027.5 x + 78278.2$ | 0.9994 | 1-250 | 0.64 | 0.20 |
|                     | $y = 224329 x + 1248420$  | 0.9994 | 1-250 |      |      |
| Clothianidin        | $y = 28034.2 x + 80933.9$ | 0.9995 | 1-250 | 0.15 | 0.42 |
|                     | $y = 66466.1 x + 259289$  | 0.9995 | 1-250 |      |      |
| Coumaphos           | $y = 173475 x + 1174690$  | 0.9972 | 1-250 | 0.13 | 0.92 |
|                     | $y = 187969 x + 1204260$  | 0.9983 | 1-250 |      |      |
| Cyanofenphos        | $y = 33068.0 x + 177828$  | 0.9992 | 2-250 | 1.35 | 0.88 |
|                     | $y = 37552.0 x + 261111$  | 0.9988 | 2-250 |      |      |
| Cyazofamid          | $y = 39266.4 x + 302492$  | 0.9955 | 1-250 | 0.62 | 0.47 |
|                     | $y = 84102.7 x + 400697$  | 0.9995 | 1-250 |      |      |
| Cyproconazole       | $y = 131468 x + 472293$   | 0.9995 | 1-250 | 0.12 | 0.81 |
|                     | $y = 161982 x + 841769$   | 0.9989 | 1-250 |      |      |
| Dicrotophos         | $y = 40116.2 x + 110419$  | 0.9996 | 1-250 | 0.19 | 0.70 |
|                     | $y = 57100.5 x + 80168.3$ | 0.9999 | 1-250 |      |      |
| Difenoconazole      | $y = 145865 x + 727039$   | 0.9993 | 1-250 | 0.09 | 0.99 |
|                     | $y = 147556 x + 675191$   | 0.9984 | 1-250 |      |      |
| Dimethoate          | $y = 60545.5 x + 142407$  | 0.9997 | 1-250 | 0.16 | 0.25 |

|                      |                           |        |       |      |      |
|----------------------|---------------------------|--------|-------|------|------|
|                      | $y = 240641 x + 586878$   | 0.9998 | 1-250 |      |      |
| Dimethomorph         | $y = 139257 x + 590544$   | 0.9983 | 1-250 | 0.18 | 0.66 |
|                      | $y = 212219 x + 858828$   | 0.9991 | 1-250 |      |      |
| Dimethyl phthalate   | $y = 18381.6 x + 535526$  | 0.9993 | 1-250 | 0.63 | 0.15 |
|                      | $y = 125246 x + 2067560$  | 0.9999 | 1-250 |      |      |
| Diniconazole         | $y = 46021.5 x + 161122$  | 0.9994 | 1-250 | 0.43 | 0.84 |
|                      | $y = 54617.9 x + 134041$  | 0.9997 | 1-250 |      |      |
| Dinotefuran          | $y = 47595.9 x + 188076$  | 0.9993 | 1-250 | 0.10 | 0.75 |
|                      | $y = 63144.0 x + 193831$  | 0.9997 | 1-250 |      |      |
| Emamectin Benzoate   | $y = 334745 x + 973657$   | 0.9992 | 1-250 | 0.46 | 1.03 |
|                      | $y = 325660 x + 628673$   | 0.9994 | 1-250 |      |      |
| Epoxiconazol         | $y = 86654.8 x + 722157$  | 0.9991 | 1-250 | 0.33 | 0.76 |
|                      | $y = 114171 x + 775284$   | 0.9975 | 1-250 |      |      |
| Ethiofencarb         | $y = 589194 x + 677383$   | 0.9995 | 1-100 | 0.57 | 0.40 |
|                      | $y = 1478020 x + 2025200$ | 0.9990 | 1-100 |      |      |
| Ethofenprox          | $y = 223592 x + 236175$   | 0.9988 | 1-250 | 0.16 | 0.85 |
|                      | $y = 263965 x + 864543$   | 0.9987 | 1-250 |      |      |
| Etoxazole            | $y = 759375 x + 2286160$  | 0.9974 | 1-100 | 0.21 | 1.00 |
|                      | $y = 758833 x + 1867190$  | 0.9985 | 1-100 |      |      |
| Fenamiphos           | $y = 309561 x + 2208160$  | 0.9980 | 1-250 | 0.55 | 0.91 |
|                      | $y = 339535 x + 3259620$  | 0.9975 | 1-250 |      |      |
| Fenamiphos sulfoxide | $y = 68375.9 x + 157169$  | 0.9993 | 1-250 | 0.48 | 0.51 |
|                      | $y = 133042 x + 550303$   | 0.9994 | 1-250 |      |      |
| Fenbuconazole        | $y = 49225.7 x + 310779$  | 0.9968 | 1-250 | 0.34 | 0.73 |
|                      | $y = 67466.4 x + 287280$  | 0.9996 | 1-250 |      |      |
| Fenpropathrin        | $y = 8536.91 x + 74887.7$ | 0.9971 | 2-250 | 1.08 | 0.85 |
|                      | $y = 10089.5 x + 53148.5$ | 0.9988 | 2-250 |      |      |
| Fipronil             | $y = 8198.34 x + 25890.3$ | 0.9983 | 1-250 | 1.21 | 0.75 |

|                      |                           |        |       |      |      |
|----------------------|---------------------------|--------|-------|------|------|
|                      | $y = 10861.0 x + 47921.3$ | 0.9971 | 1-250 |      |      |
| Fipronil-sulfone     | $y = 127209 x + 565983$   | 0.9982 | 1-250 | 0.93 | 0.68 |
|                      | $y = 187287 x + 361756$   | 0.9993 | 1-250 |      |      |
| Fludioxonil          | $y = 21209.7 x + 133422$  | 0.9986 | 1-250 | 0.11 | 0.67 |
|                      | $y = 31485.4 x + 274109$  | 0.9972 | 1-250 |      |      |
| Fluopyram            | $y = 125656 x + 438623$   | 0.9992 | 1-250 | 0.15 | 0.66 |
|                      | $y = 189716 x + 1098190$  | 0.9988 | 1-250 |      |      |
| Fluoxastrobin        | $y = 206791 x + 491519$   | 0.9997 | 1-250 | 0.31 | 0.68 |
|                      | $y = 305857 x + 2315090$  | 0.9976 | 1-250 |      |      |
| Flusilazole          | $y = 117996 x + 573059$   | 0.9983 | 1-250 | 0.24 | 0.81 |
|                      | $y = 146458 x + 721624$   | 0.9989 | 1-250 |      |      |
| Flutolanil           | $y = 191007 x + 904760$   | 0.9991 | 1-250 | 0.43 | 0.57 |
|                      | $y = 333385 x + 2389380$  | 0.9984 | 1-250 |      |      |
| Flutriafol           | $y = 16641.1 x + 46331.8$ | 0.9991 | 1-250 | 0.21 | 0.40 |
|                      | $y = 41757.2 x + 226352$  | 0.9991 | 1-250 |      |      |
| Hexaconazole         | $y = 58015.3 x + 246337$  | 0.9993 | 1-250 | 0.14 | 0.90 |
|                      | $y = 64745.7 x + 399719$  | 0.9983 | 1-250 |      |      |
| Hexaflumuron         | $y = 280357 x + 796514$   | 0.9994 | 1-250 | 0.18 | 0.83 |
|                      | $y = 337835 x + 2789150$  | 0.9972 | 1-250 |      |      |
| Hexazinone           | $y = 80015.8 x + 122487$  | 0.9997 | 1-100 | 0.61 | 0.10 |
|                      | $y = 768340 x + 1387410$  | 0.9996 | 1-100 |      |      |
| 3-Hydroxy-carbofuran | $y = 5869.19 x + 12461.5$ | 0.9999 | 2-250 | 0.82 | 0.28 |
|                      | $y = 21261.4 x + 67880.3$ | 0.9998 | 2-250 |      |      |
| Imazalil             | $y = 91053.5 x + 339121$  | 0.9992 | 1-250 | 0.37 | 0.98 |
|                      | $y = 92868.5 x + 343302$  | 0.9988 | 1-250 |      |      |
| Imidacloprid         | $y = 41506.1 x + 193546$  | 0.9993 | 1-250 | 0.14 | 0.52 |
|                      | $y = 79673.5 x + 342956$  | 0.9992 | 1-250 |      |      |
| Indoxacarb           | $y = 18408.4 x + 111598$  | 0.9976 | 1-250 | 0.26 | 0.99 |

|                 |                           |        |       |      |      |
|-----------------|---------------------------|--------|-------|------|------|
|                 | $y = 18648.3 x + 123693$  | 0.9969 | 1-250 |      |      |
| Ipconazole      | $y = 158121 x + 313169$   | 0.9995 | 1-250 | 0.18 | 0.89 |
|                 | $y = 178395 x + 768412$   | 0.9985 | 1-250 |      |      |
| Isoprocarb      | $y = 45174.0 x + 133278$  | 0.9994 | 1-250 | 0.23 | 0.36 |
|                 | $y = 126739 x + 933704$   | 0.9986 | 1-250 |      |      |
| Kresoxim-methyl | $y = 39041.8 x + 179831$  | 0.9987 | 1-250 | 0.54 | 0.90 |
|                 | $y = 43423.6 x + 289101$  | 0.9974 | 1-250 |      |      |
| Lufenuron       | $y = 10736.4 x + 119252$  | 0.9966 | 1-250 | 1.01 | 0.92 |
|                 | $y = 11683.4 x + 152160$  | 0.9943 | 1-250 |      |      |
| Machette        | $y = 193079 x + 1195940$  | 0.9980 | 1-250 | 0.17 | 0.98 |
|                 | $y = 196230 x + 1188680$  | 0.9978 | 1-250 |      |      |
| Malaoxon        | $y = 380149 x + 869837$   | 0.9985 | 1-100 | 0.40 | 0.49 |
|                 | $y = 777428 x + 1903040$  | 0.9992 | 1-100 |      |      |
| Malathion       | $y = 82921.6 x + 941505$  | 0.9965 | 1-250 | 0.98 | 0.61 |
|                 | $y = 135705 x + 1538610$  | 0.9979 | 1-250 |      |      |
| Mepronil        | $y = 1799300 x + 1250070$ | 0.9994 | 1-100 | 0.36 | 0.47 |
|                 | $y = 3839890 x + 2734280$ | 0.9993 | 1-100 |      |      |
| Metalaxyl       | $y = 291753 x + 502470$   | 0.9992 | 1-100 | 0.65 | 0.37 |
|                 | $y = 797536 x + 1731510$  | 0.9991 | 1-100 |      |      |
| Metalaxyl-M     | $y = 300943 x + 333923$   | 0.9996 | 1-100 | 0.61 | 0.38 |
|                 | $y = 792866 x + 1973550$  | 0.9990 | 1-100 |      |      |
| Methidathion    | $y = 22201.7 x + 111834$  | 0.9988 | 1-250 | 0.51 | 0.67 |
|                 | $y = 33184.7 x + 229958$  | 0.9964 | 1-250 |      |      |
| Methomyl        | $y = 51815.4 x + 193063$  | 0.9993 | 1-250 | 0.08 | 0.72 |
|                 | $y = 71661.7 x + 193993$  | 0.9996 | 1-250 |      |      |
| Methoprene      | $y = 25511.1 x + 92783.7$ | 0.9988 | 1-250 | 0.51 | 0.94 |
|                 | $y = 27018.2 x + 138200$  | 0.9980 | 1-250 |      |      |
| Methoxyfenozide | $y = 52441.1 x + 212299$  | 0.9993 | 1-250 | 0.58 | 0.72 |

|                    |                           |        |       |      |      |
|--------------------|---------------------------|--------|-------|------|------|
|                    | $y = 72975.4 x + 455840$  | 0.9984 | 1-250 |      |      |
| Mevinphos          | $y = 20202.1 x + 62303.5$ | 0.9991 | 2-250 | 0.45 | 0.29 |
|                    | $y = 70676.6 x + 155188$  | 0.9997 | 2-250 |      |      |
| Monocrotophos      | $y = 27251.2 x + 85852.1$ | 0.9992 | 1-250 | 0.34 | 0.75 |
|                    | $y = 36326.6 x + 59398.2$ | 0.9997 | 1-250 |      |      |
| Myclobutanil       | $y = 47880.6 x + 366437$  | 0.9960 | 1-250 | 0.24 | 0.78 |
|                    | $y = 61274.2 x + 590971$  | 0.9962 | 1-250 |      |      |
| Omethoate          | $y = 63881.7 x + 153465$  | 0.9995 | 1-250 | 0.06 | 0.74 |
|                    | $y = 86878.8 x + 240660$  | 0.9995 | 1-250 |      |      |
| Paclobutrazol      | $y = 243403 x + 1160070$  | 0.9987 | 1-250 | 0.24 | 0.66 |
|                    | $y = 366191 x + 2096590$  | 0.9988 | 1-250 |      |      |
| Penconazole        | $y = 72860.8 x + 630846$  | 0.9959 | 1-250 | 0.11 | 0.79 |
|                    | $y = 92647.8 x + 648178$  | 0.9979 | 1-250 |      |      |
| Phenthoate         | $y = 99214.8 x + 609397$  | 0.9987 | 1-250 | 0.46 | 0.66 |
|                    | $y = 150919 x + 1088000$  | 0.9984 | 1-250 |      |      |
| Phorate            | $y = 22784.8 x + 125411$  | 0.9985 | 1-250 | 0.21 | 0.60 |
|                    | $y = 37916.5 x + 75618.0$ | 0.9993 | 1-250 |      |      |
| Phorate sulfone    | $y = 13112.6 x + 21580.8$ | 0.9995 | 1-250 | 0.98 | 0.33 |
|                    | $y = 39917.1 x + 287688$  | 0.9986 | 1-250 |      |      |
| Phosalone          | $y = 1238670 x + 1236650$ | 0.9995 | 1-100 | 1.35 | 0.93 |
|                    | $y = 1325190 x + 2320790$ | 0.9984 | 1-100 |      |      |
| Phosfolan          | $y = 22325.7 x + 39560.9$ | 0.9997 | 1-250 | 0.58 | 0.06 |
|                    | $y = 353707 x + 1927950$  | 0.9993 | 1-250 |      |      |
| Phosphamidon       | $y = 12619.7 x + 20288.0$ | 0.9994 | 1-250 | 0.51 | 0.09 |
|                    | $y = 143170 x + 102740$   | 0.9998 | 1-250 |      |      |
| Piperonyl butoxide | $y = 317689 x + 2380920$  | 0.9957 | 1-250 | 0.26 | 1.01 |
|                    | $y = 313792 x + 1849940$  | 0.9976 | 1-250 |      |      |
| Pirimicarb         | $y = 134737 x + 286822$   | 0.9995 | 1-250 | 0.14 | 0.40 |

|                   |                           |        |       |      |      |
|-------------------|---------------------------|--------|-------|------|------|
| Pirimiphos-methyl | $y = 339671 x + 1637580$  | 0.9994 | 1-250 | 0.19 | 0.80 |
|                   | $y = 257016 x + 895463$   | 0.9983 | 1-250 |      |      |
| Prochloraz        | $y = 321052 x + 1858120$  | 0.9977 | 1-250 | 0.09 | 0.81 |
|                   | $y = 124683 x + 609326$   | 0.9984 | 1-250 |      |      |
| Profenofos        | $y = 153835 x + 1028100$  | 0.9984 | 1-250 | 0.05 | 0.86 |
|                   | $y = 86940.2 x + 663632$  | 0.9967 | 1-250 |      |      |
| Propamocarb       | $y = 100949 x + 465548$   | 0.9989 | 1-250 | 0.10 | 1.25 |
|                   | $y = 258619 x + 191987$   | 0.9996 | 1-250 |      |      |
| Propiconazole     | $y = 206167 x - 219273$   | 0.9996 | 1-250 | 0.12 | 0.87 |
|                   | $y = 85740.8 x + 500916$  | 0.9982 | 1-250 |      |      |
| Pyraclostrobin    | $y = 98529.3 x + 664585$  | 0.9977 | 1-250 | 0.20 | 0.96 |
|                   | $y = 174712 x + 847122$   | 0.9986 | 1-250 |      |      |
| Pyridaben         | $y = 181948 x + 753832$   | 0.9993 | 1-250 | 1.09 | 0.90 |
|                   | $y = 323405 x + 1787080$  | 0.9979 | 1-250 |      |      |
| Pyridafenthion    | $y = 360922 x + 3184610$  | 0.9919 | 1-250 | 1.20 | 0.83 |
|                   | $y = 141796 x + 783650$   | 0.9983 | 1-250 |      |      |
| Pyrimitate        | $y = 170224 x + 1467230$  | 0.9976 | 1-250 | 0.14 | 0.92 |
|                   | $y = 1149080 x + 102967$  | 0.9995 | 1-100 |      |      |
| Pyrisoxazole      | $y = 1245920 x + 367730$  | 0.9997 | 1-100 | 0.15 | 0.77 |
|                   | $y = 19977.6 x + 81214.9$ | 0.9996 | 1-250 |      |      |
| Simeconazole      | $y = 26076.3 x + 108653$  | 0.9987 | 1-250 | 0.13 | 0.68 |
|                   | $y = 240805 x + 1175760$  | 0.9986 | 1-250 |      |      |
| Spirodiclofen     | $y = 353108 x + 2471750$  | 0.9976 | 1-250 | 0.23 | 0.94 |
|                   | $y = 41342.2 x + 132968$  | 0.9992 | 1-250 |      |      |
| Sulfotep          | $y = 43952.5 x + 194879$  | 0.9984 | 1-250 | 0.35 | 0.79 |
|                   | $y = 176366 x + 645895$   | 0.9991 | 1-250 |      |      |
| Sulprofos         | $y = 223151 x + 1500600$  | 0.9968 | 1-250 | 0.43 | 0.95 |
|                   | $y = 80558.1 x + 747512$  | 0.9977 | 1-250 |      |      |

|                    |                          |        |       |      |      |
|--------------------|--------------------------|--------|-------|------|------|
|                    | $y = 85161.1 x + 763653$ | 0.9976 | 1-250 |      |      |
| Tebuconazole       | $y = 111005 x + 616399$  | 0.9985 | 1-250 | 0.27 | 0.71 |
|                    | $y = 156376 x + 1092590$ | 0.9961 | 1-250 |      |      |
| Tebufenozide       | $y = 43266.3 x + 142626$ | 0.9995 | 1-250 | 1.91 | 0.70 |
|                    | $y = 61535.3 x + 320772$ | 0.9979 | 1-250 |      |      |
| Tebufenpyrad       | $y = 93834.4 x + 603701$ | 0.9974 | 1-250 | 0.16 | 1.01 |
|                    | $y = 92916.7 x + 528019$ | 0.9965 | 1-250 |      |      |
| Temephos           | $y = 334720 x + 2484330$ | 0.9983 | 1-250 | 0.07 | 0.97 |
|                    | $y = 343536 x + 2610770$ | 0.9969 | 1-250 |      |      |
| Terbufos           | $y = 11341.7 x + 116840$ | 0.9969 | 2-250 | 2.08 | 0.89 |
|                    | $y = 12725.3 x + 140710$ | 0.9965 | 2-250 |      |      |
| Tetrachlorvinphos  | $y = 25855.5 x + 227391$ | 0.9958 | 1-250 | 0.03 | 0.74 |
|                    | $y = 35145.0 x + 256671$ | 0.9972 | 1-250 |      |      |
| Tetraconazole      | $y = 111531 x + 689719$  | 0.9973 | 1-250 | 0.19 | 0.61 |
|                    | $y = 182889 x + 950755$  | 0.9989 | 1-250 |      |      |
| Thiacloprid        | $y = 124932 x + 202867$  | 0.9980 | 1-100 | 0.34 | 0.19 |
|                    | $y = 649638 x + 824747$  | 0.9996 | 1-100 |      |      |
| Thiamethoxam       | $y = 82580.6 x + 349572$ | 0.9989 | 1-250 | 0.05 | 0.62 |
|                    | $y = 133709 x + 386705$  | 0.9998 | 1-250 |      |      |
| Thiophanate-methyl | $y = 78690.0 x + 418767$ | 0.9981 | 1-250 | 0.06 | 0.27 |
|                    | $y = 295481 x + 984774$  | 0.9995 | 1-250 |      |      |
| Tolfenpyrad        | $y = 97148.5 x + 712050$ | 0.9966 | 1-250 | 0.09 | 0.96 |
|                    | $y = 101463 x + 557008$  | 0.9988 | 1-250 |      |      |
| Triadimefon        | $y = 38849.2 x + 274157$ | 0.9982 | 2-250 | 1.43 | 0.83 |
|                    | $y = 46994.8 x + 450105$ | 0.9987 | 2-250 |      |      |
| Triadimenol        | $y = 30426.2 x + 171105$ | 0.9989 | 1-250 | 1.22 | 0.78 |
|                    | $y = 39055.2 x + 144867$ | 0.9995 | 1-250 |      |      |
| Trifloxystrobin    | $y = 379508 x + 616692$  | 0.9996 | 1-100 | 0.51 | 0.59 |

|               |                           |        |       |      |      |
|---------------|---------------------------|--------|-------|------|------|
| Triticonazole | $y = 646293 x + 726873$   | 0.9996 | 1-100 | 0.44 | 0.71 |
|               | $y = 70345.4 x + 167505$  | 0.9996 | 1-250 |      |      |
| Uniconazole   | $y = 99459.4 x + 431537$  | 0.9986 | 1-250 | 0.14 | 0.71 |
|               | $y = 136936 x + 573920$   | 0.9990 | 1-250 |      |      |
| Vitavax       | $y = 194158 x + 795576$   | 0.9994 | 1-250 | 0.13 | 0.12 |
|               | $y = 430037 x + 202035$   | 0.9991 | 1-100 |      |      |
|               | $y = 3487430 x + 2053310$ | 0.9985 | 1-100 |      |      |

<sup>1</sup> Calibration curves are expressed as regression lines ( $y = a x + b$ ), where y is the peak area and x is the concentration ( $\mu\text{g L}^{-1}$ ), a is the slope, b is the intercept and R is the correlation coefficient.

<sup>2</sup> The first calibration curve for each pesticide represents the matrix-matched calibration curve.

<sup>3</sup> The second calibration curve for each pesticide represents the solvent standard calibration curve.



**Table S3 The linearity, LOD and ME of each pesticide in FU.**

| Pesticides    | $^1y=a x+b$                 | R      | Linear range,<br>$\mu\text{g L}^{-1}$ | LOD,<br>$\mu\text{g L}^{-1}$ | ME   |
|---------------|-----------------------------|--------|---------------------------------------|------------------------------|------|
| Acephate      | $^2y = 83848.6 x + 36853.8$ | 0.9999 | 1-250                                 | 0.28                         | 0.88 |
|               | $^3y = 95454.7 x + 126007$  | 0.9998 | 1-250                                 |                              |      |
| Acetamiprid   | $y = 116746 x + 558228$     | 0.9973 | 1-250                                 | 0.28                         | 0.54 |
|               | $y = 216310 x + 859034$     | 0.9996 | 1-250                                 |                              |      |
| Alachlor      | $y = 1313040 x + 2102990$   | 0.9997 | 1-100                                 | 1.33                         | 1.00 |
|               | $y = 1319150 x + 3664510$   | 0.9956 | 1-100                                 |                              |      |
| Atrazine      | $y = 139855 x + 1059030$    | 0.9964 | 1-250                                 | 0.24                         | 0.86 |
|               | $y = 163204 x + 1200030$    | 0.9981 | 1-250                                 |                              |      |
| Avermectin    | $y = 13242.1 x + 32802.4$   | 0.9996 | 1-250                                 | 1.06                         | 0.84 |
|               | $y = 15804.3 x + 78893.4$   | 0.9978 | 1-250                                 |                              |      |
| Azaconazole   | $y = 244370 x + 1408030$    | 0.9973 | 1-250                                 | 0.80                         | 0.93 |
|               | $y = 264001 x + 1277940$    | 0.9993 | 1-250                                 |                              |      |
| Azamethiphos  | $y = 82116.8 x + 202661$    | 0.9991 | 1-250                                 | 0.23                         | 0.93 |
|               | $y = 88694.2 x - 180974$    | 0.9985 | 1-250                                 |                              |      |
| Azoxystrobin  | $y = 727885 x + 1611050$    | 0.9961 | 1-100                                 | 1.00                         | 0.96 |
|               | $y = 758953 x + 1340200$    | 0.9989 | 1-100                                 |                              |      |
| Benalaxyl     | $y = 147812 x + 760647$     | 0.9975 | 1-250                                 | 0.47                         | 0.99 |
|               | $y = 149996 x + 734635$     | 0.9988 | 1-250                                 |                              |      |
| Bendiocarb    | $y = 87598.0 x + 363280$    | 0.9983 | 1-250                                 | 0.13                         | 0.89 |
|               | $y = 98646.2 x + 217493$    | 0.9996 | 1-250                                 |                              |      |
| Bitertanol    | $y = 10741.8 x + 58514.5$   | 0.9992 | 1-250                                 | 1.71                         | 0.98 |
|               | $y = 10941.0 x + 27922.0$   | 0.9991 | 1-250                                 |                              |      |
| Bromuconazole | $y = 32525.1 x + 180056$    | 0.9970 | 1-250                                 | 1.78                         | 0.91 |
|               | $y = 35549.1 x + 205283$    | 0.9991 | 1-250                                 |                              |      |
| Buprofezin    | $y = 289338 x + 1562960$    | 0.9984 | 1-250                                 | 0.03                         | 0.98 |

|                     |                           |        |       |      |      |
|---------------------|---------------------------|--------|-------|------|------|
|                     | $y = 296179 x + 1739250$  | 0.9981 | 1-250 |      |      |
| Cadusafos           | $y = 190619 x + 495273$   | 0.9997 | 1-250 | 1.53 | 0.62 |
|                     | $y = 305975 x + 1489500$  | 0.9990 | 1-250 |      |      |
| Carbendazim         | $y = 108146 x + 1845410$  | 0.9998 | 1-250 | 0.23 | 0.34 |
|                     | $y = 320186 x + 1825120$  | 0.9988 | 1-250 |      |      |
| Carbofuran          | $y = 205492 x + 1011220$  | 0.9982 | 1-250 | 0.29 | 0.65 |
|                     | $y = 315291 x + 1980730$  | 0.9990 | 1-250 |      |      |
| Chlorantraniliprole | $y = 62905.7 x + 344358$  | 0.9975 | 1-250 | 0.51 | 1.03 |
|                     | $y = 60806.5 x + 374502$  | 0.9984 | 1-250 |      |      |
| Chlorpyrifos        | $y = 1121380 x + 1464310$ | 0.9993 | 1-100 | 0.12 | 0.96 |
|                     | $y = 1170180 x + 1250410$ | 0.9991 | 1-100 |      |      |
| Chlortoluron        | $y = 163232 x + 1370070$  | 0.9955 | 1-250 | 0.26 | 0.73 |
|                     | $y = 224329 x + 1248420$  | 0.9994 | 1-250 |      |      |
| Clothianidin        | $y = 45353.5 x + 159716$  | 0.9989 | 1-250 | 0.14 | 0.68 |
|                     | $y = 66466.1 x + 259289$  | 0.9995 | 1-250 |      |      |
| Coumaphos           | $y = 201587 x + 1139780$  | 0.9987 | 1-250 | 0.15 | 1.07 |
|                     | $y = 187969 x + 1204260$  | 0.9983 | 1-250 |      |      |
| Cyanofenphos        | $y = 35902.6 x + 168748$  | 0.9987 | 1-250 | 0.42 | 0.94 |
|                     | $y = 38061.2 x + 194748$  | 0.9990 | 1-250 |      |      |
| Cyazofamid          | $y = 56238.7 x + 187989$  | 0.9996 | 1-250 | 0.43 | 0.67 |
|                     | $y = 84102.7 x + 400697$  | 0.9995 | 1-250 |      |      |
| Cyproconazole       | $y = 149269 x + 367582$   | 0.9997 | 1-250 | 0.08 | 0.92 |
|                     | $y = 161982 x + 841769$   | 0.9989 | 1-250 |      |      |
| Dicrotophos         | $y = 56324.5 x + 132938$  | 0.9997 | 1-250 | 0.33 | 0.99 |
|                     | $y = 57100.5 x + 80168.3$ | 0.9999 | 1-250 |      |      |
| Difenoconazole      | $y = 100723 x + 228243$   | 0.9998 | 1-250 | 0.13 | 0.68 |
|                     | $y = 147556 x + 675191$   | 0.9984 | 1-250 |      |      |
| Dimethoate          | $y = 107520 x + 447380$   | 0.9977 | 1-250 | 0.20 | 0.45 |

|                      |                           |        |       |      |      |
|----------------------|---------------------------|--------|-------|------|------|
|                      | $y = 240641 x + 586878$   | 0.9998 | 1-250 |      |      |
| Dimethomorph         | $y = 214509 x + 899166$   | 0.9985 | 1-250 | 0.13 | 1.01 |
|                      | $y = 212219 x + 858828$   | 0.9991 | 1-250 |      |      |
| Dimethyl phthalate   | $y = 102713 x + 1999330$  | 0.9997 | 1-250 | 0.66 | 0.82 |
|                      | $y = 125246 x + 2067560$  | 0.9999 | 1-250 |      |      |
| Diniconazole         | $y = 44907.8 x + 180906$  | 0.9985 | 1-250 | 0.13 | 0.82 |
|                      | $y = 54617.9 x + 134041$  | 0.9997 | 1-250 |      |      |
| Dinotefuran          | $y = 61236.4 x + 149237$  | 0.9995 | 1-250 | 0.10 | 0.97 |
|                      | $y = 63144.0 x + 193831$  | 0.9997 | 1-250 |      |      |
| Emamectin Benzoate   | $y = 336122 x + 1116430$  | 0.9987 | 1-250 | 0.44 | 1.03 |
|                      | $y = 325660 x + 628673$   | 0.9994 | 1-250 |      |      |
| Epoxiconazol         | $y = 105689 x + 2994140$  | 0.9995 | 1-250 | 0.20 | 0.93 |
|                      | $y = 114171 x + 775284$   | 0.9975 | 1-250 |      |      |
| Ethiofencarb         | $y = 1358710 x + 1128630$ | 0.9996 | 1-100 | 0.48 | 0.92 |
|                      | $y = 1478020 x + 2025200$ | 0.9990 | 1-100 |      |      |
| Ethofenprox          | $y = 293783 x + 242423$   | 0.9986 | 1-250 | 0.10 | 1.11 |
|                      | $y = 263965 x + 864543$   | 0.9987 | 1-250 |      |      |
| Etoxazole            | $y = 766552 x + 2063020$  | 0.9980 | 1-100 | 0.17 | 1.01 |
|                      | $y = 758833 x + 1867190$  | 0.9985 | 1-100 |      |      |
| Fenamiphos           | $y = 325516 x + 2852170$  | 0.9955 | 1-250 | 0.94 | 0.96 |
|                      | $y = 339535 x + 3259620$  | 0.9975 | 1-250 |      |      |
| Fenamiphos sulfoxide | $y = 110182 x + 591528$   | 0.9986 | 1-250 | 0.39 | 0.83 |
|                      | $y = 133042 x + 550303$   | 0.9994 | 1-250 |      |      |
| Fenbuconazole        | $y = 60227.8 x + 401587$  | 0.9973 | 1-250 | 0.72 | 0.89 |
|                      | $y = 67466.4 x + 287280$  | 0.9996 | 1-250 |      |      |
| Fenpropathrin        | $y = 7367.21 x + 86720.4$ | 0.9960 | 2-250 | 1.14 | 0.73 |
|                      | $y = 10089.5 x + 53148.5$ | 0.9988 | 2-250 |      |      |
| Fipronil             | $y = 10780.8 x + 30409.4$ | 0.9996 | 1-250 | 0.65 | 0.99 |

|                      |                           |        |       |      |      |
|----------------------|---------------------------|--------|-------|------|------|
| Fipronil-sulfone     | $y = 10861.0 x + 47921.3$ | 0.9971 | 1-250 | 0.34 | 0.86 |
|                      | $y = 161445 x + 548021$   | 0.9984 | 1-250 |      |      |
| Fludioxonil          | $y = 187287 x + 361756$   | 0.9993 | 1-250 | 0.08 | 1.00 |
|                      | $y = 31447.4 x + 281011$  | 0.9977 | 1-250 |      |      |
| Fluopyram            | $y = 31485.4 x + 274109$  | 0.9972 | 1-250 | 0.26 | 0.85 |
|                      | $y = 160962 x + 895861$   | 0.9980 | 1-250 |      |      |
| Fluoxastrobin        | $y = 189716 x + 1098190$  | 0.9988 | 1-250 | 0.22 | 0.92 |
|                      | $y = 282834 x + 1309120$  | 0.9988 | 1-250 |      |      |
| Flusilazole          | $y = 305857 x + 2315090$  | 0.9976 | 1-250 | 0.73 | 0.73 |
|                      | $y = 107310 x + 523591$   | 0.9988 | 1-250 |      |      |
| Flutolanil           | $y = 146458 x + 721624$   | 0.9989 | 1-250 | 0.30 | 0.97 |
|                      | $y = 322251 x + 2550380$  | 0.9963 | 1-250 |      |      |
| Flutriafol           | $y = 333385 x + 2389380$  | 0.9984 | 1-250 | 0.29 | 0.74 |
|                      | $y = 30707.9 x + 175757$  | 0.9969 | 1-250 |      |      |
| Hexaconazole         | $y = 41757.2 x + 226352$  | 0.9991 | 1-250 | 0.12 | 0.98 |
|                      | $y = 63430.1 x + 318117$  | 0.9990 | 1-250 |      |      |
| Hexaflumuron         | $y = 64745.7 x + 399719$  | 0.9983 | 1-250 | 0.08 | 0.93 |
|                      | $y = 313035 x + 2517720$  | 0.9951 | 1-250 |      |      |
| Hexazinone           | $y = 337835 x + 2789150$  | 0.9972 | 1-250 | 0.34 | 0.85 |
|                      | $y = 653882 x - 145414$   | 0.9995 | 1-100 |      |      |
| 3-Hydroxy-carbofuran | $y = 768340 x + 1387410$  | 0.9996 | 1-100 | 0.66 | 0.59 |
|                      | $y = 12646.7 x + 54763.2$ | 0.9988 | 2-250 |      |      |
| Imazalil             | $y = 21261.4 x + 67880.3$ | 0.9998 | 2-250 | 0.23 | 0.93 |
|                      | $y = 85996.6 x + 353852$  | 0.9988 | 1-250 |      |      |
| Imidacloprid         | $y = 92868.5 x + 343302$  | 0.9988 | 1-250 | 0.33 | 0.71 |
|                      | $y = 56668.0 x + 424640$  | 0.9982 | 1-250 |      |      |
| Indoxacarb           | $y = 79673.5 x + 342956$  | 0.9992 | 1-250 | 0.58 | 1.16 |
|                      | $y = 21694.2 x + 105009$  | 0.9983 | 1-250 |      |      |

|                 |                           |        |       |      |      |
|-----------------|---------------------------|--------|-------|------|------|
| Ipconazole      | $y = 18648.3 x + 123693$  | 0.9969 | 1-250 | 0.12 | 0.96 |
|                 | $y = 171293 x + 635191$   | 0.9989 | 1-250 |      |      |
| Isoprocarb      | $y = 178395 x + 768412$   | 0.9985 | 1-250 | 0.19 | 0.88 |
|                 | $y = 110946 x + 735958$   | 0.9974 | 1-250 |      |      |
| Kresoxim-methyl | $y = 126739 x + 933704$   | 0.9986 | 1-250 | 0.17 | 0.96 |
|                 | $y = 41565.4 x + 237216$  | 0.9985 | 1-250 |      |      |
| Lufenuron       | $y = 43423.6 x + 289101$  | 0.9974 | 1-250 | 1.23 | 1.04 |
|                 | $y = 12114.9 x + 134392$  | 0.9956 | 1-250 |      |      |
| Machette        | $y = 11683.4 x + 152160$  | 0.9943 | 1-250 | 0.14 | 1.03 |
|                 | $y = 202657 x + 1241520$  | 0.9983 | 1-250 |      |      |
| Malaoxon        | $y = 196230 x + 1188680$  | 0.9978 | 1-250 | 0.46 | 0.98 |
|                 | $y = 761406 x + 1286320$  | 0.9990 | 1-100 |      |      |
| Malathion       | $y = 777428 x + 1903040$  | 0.9992 | 1-100 | 0.94 | 0.84 |
|                 | $y = 113980 x + 1538680$  | 0.9971 | 1-250 |      |      |
| Mepronil        | $y = 135705 x + 1538610$  | 0.9979 | 1-250 | 0.19 | 0.82 |
|                 | $y = 3160010 x + 478991$  | 0.9981 | 1-100 |      |      |
| Metalaxyl       | $y = 3839890 x + 2734280$ | 0.9993 | 1-100 | 0.55 | 0.85 |
|                 | $y = 676746 x + 1490290$  | 0.9979 | 1-100 |      |      |
| Metalaxyl-M     | $y = 797536 x + 1731510$  | 0.9991 | 1-100 | 0.53 | 0.91 |
|                 | $y = 719594 x + 1522050$  | 0.9984 | 1-100 |      |      |
| Methidathion    | $y = 792866 x + 1973550$  | 0.9990 | 1-100 | 0.63 | 0.92 |
|                 | $y = 30541.0 x + 161431$  | 0.9985 | 1-250 |      |      |
| Methomyl        | $y = 33184.7 x + 229958$  | 0.9964 | 1-250 | 0.11 | 0.49 |
|                 | $y = 35435.6 x + 9213.96$ | 0.9998 | 1-250 |      |      |
| Methoprene      | $y = 71661.7 x + 193993$  | 0.9996 | 1-250 | 1.25 | 1.07 |
|                 | $y = 29030.0 x + 32855.7$ | 0.9997 | 1-250 |      |      |
| Methoxyfenozide | $y = 27018.2 x + 138200$  | 0.9980 | 1-250 | 0.17 | 1.13 |
|                 | $y = 82322.0 x + 371476$  | 0.9984 | 1-250 |      |      |

|                    |                           |        |       |      |      |
|--------------------|---------------------------|--------|-------|------|------|
|                    | $y = 72975.4 x + 455840$  | 0.9984 | 1-250 |      |      |
| Mevinphos          | $y = 47084.2 x + 111110$  | 0.9996 | 1-250 | 0.58 | 0.66 |
|                    | $y = 70804.9 x + 132770$  | 0.9997 | 1-250 |      |      |
| Monocrotophos      | $y = 26702.4 x + 11922.5$ | 0.9999 | 1-250 | 0.46 | 0.74 |
|                    | $y = 36326.6 x + 59398.2$ | 0.9997 | 1-250 |      |      |
| Myclobutanil       | $y = 59431.2 x + 592542$  | 0.9965 | 1-250 | 0.38 | 0.97 |
|                    | $y = 61274.2 x + 590971$  | 0.9962 | 1-250 |      |      |
| Omethoate          | $y = 88059.1 x + 151544$  | 0.9998 | 1-250 | 0.27 | 1.01 |
|                    | $y = 86878.8 x + 240660$  | 0.9995 | 1-250 |      |      |
| Paclobutrazol      | $y = 319684 x + 1763260$  | 0.9972 | 1-250 | 0.28 | 0.87 |
|                    | $y = 366191 x + 2096590$  | 0.9988 | 1-250 |      |      |
| Penconazole        | $y = 86244.6 x + 413768$  | 0.9994 | 1-250 | 0.12 | 0.93 |
|                    | $y = 92647.8 x + 648178$  | 0.9979 | 1-250 |      |      |
| Phenthoate         | $y = 118592 x + 775043$   | 0.9985 | 1-250 | 0.09 | 0.79 |
|                    | $y = 150919 x + 1088000$  | 0.9984 | 1-250 |      |      |
| Phorate            | $y = 22085.9 x + 111576$  | 0.9984 | 1-250 | 0.30 | 0.58 |
|                    | $y = 37916.5 x + 75618.0$ | 0.9993 | 1-250 |      |      |
| Phorate sulfone    | $y = 34169.8 x + 337596$  | 0.9966 | 2-250 | 0.84 | 0.86 |
|                    | $y = 39625.3 x + 338644$  | 0.9989 | 2-250 |      |      |
| Phosalone          | $y = 1295660 x + 2414800$ | 0.9984 | 1-100 | 1.05 | 0.98 |
|                    | $y = 1325190 x + 2320790$ | 0.9984 | 1-100 |      |      |
| Phosfolan          | $y = 196878 x + 381820$   | 0.9997 | 1-250 | 0.26 | 0.56 |
|                    | $y = 353707 x + 1927950$  | 0.9993 | 1-250 |      |      |
| Phosphamidon       | $y = 102921 x + 82522.9$  | 0.9999 | 1-250 | 0.31 | 0.72 |
|                    | $y = 143170 x + 102740$   | 0.9998 | 1-250 |      |      |
| Piperonyl butoxide | $y = 319221 x + 1873990$  | 0.9976 | 1-250 | 0.05 | 1.02 |
|                    | $y = 313792 x + 1849940$  | 0.9976 | 1-250 |      |      |
| Pirimicarb         | $y = 325350 x + 1790040$  | 0.9972 | 1-250 | 0.11 | 0.96 |

|                   |                           |        |       |      |      |
|-------------------|---------------------------|--------|-------|------|------|
| Pirimiphos-methyl | $y = 339671 x + 1637580$  | 0.9994 | 1-250 | 0.07 | 0.79 |
|                   | $y = 252773 x + 950543$   | 0.9988 | 1-250 |      |      |
| Prochloraz        | $y = 321052 x + 1858120$  | 0.9977 | 1-250 | 0.06 | 0.97 |
|                   | $y = 149777 x + 638872$   | 0.9990 | 1-250 |      |      |
| Profenofos        | $y = 153835 x + 1028100$  | 0.9984 | 1-250 | 0.05 | 0.94 |
|                   | $y = 94934.9 x + 614688$  | 0.9983 | 1-250 |      |      |
| Propamocarb       | $y = 100949 x + 465548$   | 0.9989 | 1-250 | 0.17 | 1.17 |
|                   | $y = 241911 x + 87744.7$  | 0.9999 | 1-250 |      |      |
| Propiconazole     | $y = 206167 x - 219273$   | 0.9996 | 1-250 | 0.08 | 1.01 |
|                   | $y = 99753.9 x + 500845$  | 0.9987 | 1-250 |      |      |
| Pyraclostrobin    | $y = 98529.3 x + 664585$  | 0.9977 | 1-250 | 0.15 | 1.04 |
|                   | $y = 190042 x + 1186800$  | 0.9986 | 1-250 |      |      |
| Pyridaben         | $y = 181948 x + 753832$   | 0.9993 | 1-250 | 0.53 | 0.96 |
|                   | $y = 346464 x + 1918410$  | 0.9985 | 1-250 |      |      |
| Pyridafenthion    | $y = 360922 x + 3184610$  | 0.9919 | 1-250 | 0.91 | 1.09 |
|                   | $y = 185441 x + 1555610$  | 0.9961 | 1-250 |      |      |
| Pyrimitate        | $y = 170224 x + 1467230$  | 0.9976 | 1-250 | 0.38 | 0.99 |
|                   | $y = 1230110 x + 478425$  | 0.9999 | 1-100 |      |      |
| Pyrisoxazole      | $y = 1245920 x + 367730$  | 0.9997 | 1-100 | 0.40 | 0.88 |
|                   | $y = 22862.0 x + 9114.65$ | 0.9998 | 1-250 |      |      |
| Simeconazole      | $y = 26076.3 x + 108653$  | 0.9987 | 1-250 | 0.10 | 0.90 |
|                   | $y = 318647 x + 1666090$  | 0.9980 | 1-250 |      |      |
| Spirodiclofen     | $y = 353108 x + 2471750$  | 0.9976 | 1-250 | 0.15 | 1.03 |
|                   | $y = 45475.6 x + 176387$  | 0.9990 | 1-250 |      |      |
| Sulfotep          | $y = 43952.5 x + 194879$  | 0.9984 | 1-250 | 0.12 | 0.99 |
|                   | $y = 221374 x + 1231670$  | 0.9973 | 1-250 |      |      |
| Sulprofos         | $y = 223151 x + 1500600$  | 0.9968 | 1-250 | 0.63 | 0.90 |
|                   | $y = 76928.3 x + 768290$  | 0.9974 | 1-250 |      |      |

|                    |                           |        |       |      |      |
|--------------------|---------------------------|--------|-------|------|------|
|                    | $y = 85161.1 x + 763653$  | 0.9976 | 1-250 |      |      |
| Tebuconazole       | $y = 140211 x + 641730$   | 0.9985 | 1-250 | 0.07 | 0.90 |
|                    | $y = 156376 x + 1092590$  | 0.9961 | 1-250 |      |      |
| Tebufenozide       | $y = 49185.9 x + 209616$  | 0.9990 | 1-250 | 0.95 | 0.80 |
|                    | $y = 61535.3 x + 320772$  | 0.9979 | 1-250 |      |      |
| Tebufenpyrad       | $y = 106143 x + 401472$   | 0.9988 | 1-250 | 0.07 | 1.14 |
|                    | $y = 92916.7 x + 528019$  | 0.9965 | 1-250 |      |      |
| Temephos           | $y = 340627 x + 2644300$  | 0.9976 | 1-250 | 0.08 | 0.99 |
|                    | $y = 343536 x + 2610770$  | 0.9969 | 1-250 |      |      |
| Terbufos           | $y = 12269.9 x + 148484$  | 0.9947 | 2-250 | 2.67 | 0.96 |
|                    | $y = 12725.3 x + 140710$  | 0.9965 | 2-250 |      |      |
| Tetrachlorvinphos  | $y = 28255.7 x + 229903$  | 0.9970 | 1-250 | 0.06 | 0.80 |
|                    | $y = 35145.0 x + 256671$  | 0.9972 | 1-250 |      |      |
| Tetraconazole      | $y = 145932 x + 795883$   | 0.9974 | 1-250 | 0.33 | 0.80 |
|                    | $y = 182889 x + 950755$   | 0.9989 | 1-250 |      |      |
| Thiacloprid        | $y = 165257 x + 26780.4$  | 0.9998 | 1-100 | 0.43 | 0.25 |
|                    | $y = 649638 x + 824747$   | 0.9996 | 1-100 |      |      |
| Thiamethoxam       | $y = 52103.0 x + 69765.9$ | 0.9998 | 1-250 | 0.15 | 0.39 |
|                    | $y = 133709 x + 386705$   | 0.9998 | 1-250 |      |      |
| Thiophanate-methyl | $y = 248271 x + 1154090$  | 0.9980 | 1-250 | 0.18 | 0.84 |
|                    | $y = 295481 x + 984774$   | 0.9995 | 1-250 |      |      |
| Tolfenpyrad        | $y = 105060 x + 521093$   | 0.9984 | 1-250 | 0.08 | 1.04 |
|                    | $y = 101463 x + 557008$   | 0.9988 | 1-250 |      |      |
| Triadimefon        | $y = 49551.4 x + 537757$  | 0.9971 | 2-250 | 1.63 | 1.05 |
|                    | $y = 46994.8 x + 450105$  | 0.9987 | 2-250 |      |      |
| Triadimenol        | $y = 41818.0 x + 212857$  | 0.9992 | 1-250 | 1.55 | 1.07 |
|                    | $y = 39055.2 x + 144867$  | 0.9995 | 1-250 |      |      |
| Trifloxystrobin    | $y = 252629 x + 176424$   | 0.9997 | 1-100 | 0.67 | 0.39 |



|               |                           |        |       |      |      |
|---------------|---------------------------|--------|-------|------|------|
| Triticonazole | $y = 646293 x + 726873$   | 0.9996 | 1-100 | 0.30 | 0.97 |
|               | $y = 96013.4 x + 92039.4$ | 0.9999 | 1-250 |      |      |
| Uniconazole   | $y = 99459.4 x + 431537$  | 0.9986 | 1-250 | 0.77 | 0.84 |
|               | $y = 162925 x + 551645$   | 0.9993 | 1-250 |      |      |
| Vitavax       | $y = 194158 x + 795576$   | 0.9994 | 1-250 | 0.08 | 0.88 |
|               | $y = 3070450 x + 78264.2$ | 0.9990 | 1-100 |      |      |
|               | $y = 3487430 x + 2053310$ | 0.9985 | 1-100 |      |      |

<sup>1</sup> Calibration curves are expressed as regression lines ( $y = a x + b$ ), where y is the peak area and x is the concentration ( $\mu\text{g L}^{-1}$ ), a is the slope, b is the intercept and R is the correlation coefficient.

<sup>2</sup> The first calibration curve for each pesticide represents the matrix-matched calibration curve.

<sup>3</sup> The second calibration curve for each pesticide represents the solvent standard calibration curve.

**Table S4 The linearity, LOD and ME of each pesticide in FC.**

| Pesticides    | $^1y=a x+b$                 | R      | Linear range,<br>$\mu\text{g L}^{-1}$ | LOD,<br>$\mu\text{g L}^{-1}$ | ME   |
|---------------|-----------------------------|--------|---------------------------------------|------------------------------|------|
| Acephate      | $^2y = 85843.1 x + 44764.7$ | 0.9999 | 1-250                                 | 0.13                         | 0.90 |
|               | $^3y = 95454.7 x + 126007$  | 0.9998 | 1-250                                 |                              |      |
| Acetamiprid   | $y = 76240.7 x - 10158.0$   | 0.9992 | 1-250                                 | 0.14                         | 0.35 |
|               | $y = 216310 x + 859034$     | 0.9996 | 1-250                                 |                              |      |
| Alachlor      | $y = 1224780 x + 2898890$   | 0.9990 | 1-100                                 | 1.07                         | 0.93 |
|               | $y = 1319150 x + 3664510$   | 0.9956 | 1-100                                 |                              |      |
| Atrazine      | $y = 142505 x + 721217$     | 0.9970 | 1-250                                 | 0.44                         | 0.87 |
|               | $y = 163204 x + 1200030$    | 0.9981 | 1-250                                 |                              |      |
| Avermectin    | $y = 15608.7 x + 46863.3$   | 0.9985 | 1-250                                 | 1.28                         | 0.99 |
|               | $y = 15804.3 x + 78893.4$   | 0.9978 | 1-250                                 |                              |      |
| Azaconazole   | $y = 203444 x + 851389$     | 0.9994 | 1-250                                 | 0.80                         | 0.77 |
|               | $y = 264001 x + 1277940$    | 0.9993 | 1-250                                 |                              |      |
| Azamethiphos  | $y = 43326.2 x - 201892$    | 0.9967 | 1-250                                 | 0.39                         | 0.49 |
|               | $y = 88694.2 x - 180974$    | 0.9985 | 1-250                                 |                              |      |
| Azoxystrobin  | $y = 627210 x + 836428$     | 0.9996 | 1-100                                 | 0.82                         | 0.83 |
|               | $y = 758953 x + 1340200$    | 0.9989 | 1-100                                 |                              |      |
| Benalaxyl     | $y = 151326 x + 613130$     | 0.9988 | 1-250                                 | 0.17                         | 1.01 |
|               | $y = 149996 x + 734635$     | 0.9988 | 1-250                                 |                              |      |
| Bendiocarb    | $y = 71733.1 x - 57901.8$   | 0.9988 | 1-250                                 | 0.35                         | 0.73 |
|               | $y = 98646.2 x + 217493$    | 0.9996 | 1-250                                 |                              |      |
| Bitertanol    | $y = 12066.2 x + 31163.3$   | 0.9992 | 1-250                                 | 1.58                         | 1.10 |
|               | $y = 10941.0 x + 27922.0$   | 0.9991 | 1-250                                 |                              |      |
| Bromuconazole | $y = 29217.3 x + 182005$    | 0.9978 | 1-250                                 | 2.20                         | 0.82 |
|               | $y = 35549.1 x + 205283$    | 0.9991 | 1-250                                 |                              |      |
| Buprofezin    | $y = 288072 x + 1755700$    | 0.9976 | 1-250                                 | 0.05                         | 0.97 |

|                     |                           |        |       |      |      |
|---------------------|---------------------------|--------|-------|------|------|
| Cadusafos           | $y = 296179 x + 1739250$  | 0.9981 | 1-250 | 0.61 | 0.92 |
|                     | $y = 282998 x + 560925$   | 0.9970 | 1-250 |      |      |
| Carbendazim         | $y = 305975 x + 1489500$  | 0.9990 | 1-250 | 0.19 | 0.69 |
|                     | $y = 222290 x + 377617$   | 0.9998 | 1-250 |      |      |
| Carbofuran          | $y = 320186 x + 1825120$  | 0.9988 | 1-250 | 0.28 | 0.52 |
|                     | $y = 163976 x - 282664$   | 0.9990 | 1-250 |      |      |
| Chlorantraniliprole | $y = 315291 x + 1980730$  | 0.9990 | 1-250 | 0.49 | 0.90 |
|                     | $y = 54913.8 x + 203917$  | 0.9994 | 1-250 |      |      |
| Chlorpyrifos        | $y = 60806.5 x + 374502$  | 0.9984 | 1-250 | 0.11 | 0.89 |
|                     | $y = 1041230 x + 1438380$ | 0.9989 | 1-100 |      |      |
| Chlortoluron        | $y = 1170180 x + 1250410$ | 0.9991 | 1-100 | 0.41 | 0.68 |
|                     | $y = 152776 x + 513988$   | 0.9996 | 1-250 |      |      |
| Clothianidin        | $y = 224329 x + 1248420$  | 0.9994 | 1-250 | 0.21 | 0.44 |
|                     | $y = 29054.7 x - 6445.24$ | 0.9994 | 1-250 |      |      |
| Coumaphos           | $y = 66466.1 x + 259289$  | 0.9995 | 1-250 | 0.12 | 0.98 |
|                     | $y = 183781 x + 1287480$  | 0.9983 | 1-250 |      |      |
| Cyanofenphos        | $y = 187969 x + 1204260$  | 0.9983 | 1-250 | 0.28 | 0.91 |
|                     | $y = 34604.8 x + 227348$  | 0.9982 | 1-250 |      |      |
| Cyazofamid          | $y = 38061.2 x + 194748$  | 0.9990 | 1-250 | 0.13 | 0.64 |
|                     | $y = 53791.9 x + 237882$  | 0.9991 | 1-250 |      |      |
| Cyproconazole       | $y = 84102.7 x + 400697$  | 0.9995 | 1-250 | 0.09 | 0.91 |
|                     | $y = 147671 x + 515065$   | 0.9994 | 1-250 |      |      |
| Dicrotophos         | $y = 161982 x + 841769$   | 0.9989 | 1-250 | 0.20 | 0.98 |
|                     | $y = 56160.8 x + 18675.4$ | 0.9998 | 1-250 |      |      |
| Difenoconazole      | $y = 57100.5 x + 80168.3$ | 0.9999 | 1-250 | 0.15 | 1.02 |
|                     | $y = 150052 x + 427557$   | 0.9995 | 1-250 |      |      |
| Dimethoate          | $y = 147556 x + 675191$   | 0.9984 | 1-250 | 0.18 | 0.48 |
|                     | $y = 116512 x + 48130.9$  | 0.9996 | 1-250 |      |      |

|                      |                           |        |       |      |      |
|----------------------|---------------------------|--------|-------|------|------|
|                      | $y = 240641 x + 586878$   | 0.9998 | 1-250 |      |      |
| Dimethomorph         | $y = 200599 x + 532745$   | 0.9993 | 1-250 | 0.20 | 0.95 |
|                      | $y = 212219 x + 858828$   | 0.9991 | 1-250 |      |      |
| Dimethyl phthalate   | $y = 57382.9 x + 742812$  | 0.9963 | 1-250 | 0.71 | 0.46 |
|                      | $y = 125246 x + 2067560$  | 0.9999 | 1-250 |      |      |
| Diniconazole         | $y = 50554.6 x + 40536.1$ | 0.9998 | 1-250 | 0.29 | 0.93 |
|                      | $y = 54617.9 x + 134041$  | 0.9997 | 1-250 |      |      |
| Dinotefuran          | $y = 60226.3 x + 137754$  | 0.9998 | 1-250 | 0.18 | 0.95 |
|                      | $y = 63144.0 x + 193831$  | 0.9997 | 1-250 |      |      |
| Emamectin Benzoate   | $y = 332491 x + 754358$   | 0.9985 | 1-250 | 0.48 | 1.02 |
|                      | $y = 325660 x + 628673$   | 0.9994 | 1-250 |      |      |
| Epoxiconazol         | $y = 83906.6 x + 857340$  | 0.9981 | 1-250 | 0.18 | 0.73 |
|                      | $y = 114171 x + 775284$   | 0.9975 | 1-250 |      |      |
| Ethiofencarb         | $y = 899696 x + 1917390$  | 0.9974 | 1-100 | 0.64 | 0.61 |
|                      | $y = 1478020 x + 2025200$ | 0.9990 | 1-100 |      |      |
| Ethofenprox          | $y = 280218 x + 981199$   | 0.9969 | 1-250 | 0.15 | 1.06 |
|                      | $y = 263965 x + 864543$   | 0.9987 | 1-250 |      |      |
| Etoxazole            | $y = 752726 x + 1743730$  | 0.9988 | 1-100 | 0.20 | 0.99 |
|                      | $y = 758833 x + 1867190$  | 0.9985 | 1-100 |      |      |
| Fenamiphos           | $y = 332323 x + 3158540$  | 0.9970 | 1-250 | 0.63 | 0.98 |
|                      | $y = 339535 x + 3259620$  | 0.9975 | 1-250 |      |      |
| Fenamiphos sulfoxide | $y = 85419.8 x + 22632.2$ | 0.9993 | 1-250 | 0.49 | 0.64 |
|                      | $y = 133042 x + 550303$   | 0.9994 | 1-250 |      |      |
| Fenbuconazole        | $y = 59843.5 x + 248121$  | 0.9993 | 1-250 | 0.19 | 0.89 |
|                      | $y = 67466.4 x + 287280$  | 0.9996 | 1-250 |      |      |
| Fenpropathrin        | $y = 8840.35 x + 53147.8$ | 0.9987 | 2-250 | 1.43 | 0.88 |
|                      | $y = 10089.5 x + 53148.5$ | 0.9988 | 2-250 |      |      |
| Fipronil             | $y = 10506.4 x + 10164.4$ | 0.9996 | 1-250 | 0.78 | 0.97 |

|                      |                           |        |       |      |      |
|----------------------|---------------------------|--------|-------|------|------|
| Fipronil-sulfone     | $y = 10861.0 x + 47921.3$ | 0.9971 | 1-250 | 0.25 | 0.85 |
|                      | $y = 159820 x + 124915$   | 0.9999 | 1-250 |      |      |
| Fludioxonil          | $y = 187287 x + 361756$   | 0.9993 | 1-250 | 0.06 | 0.93 |
|                      | $y = 29234.3 x + 226935$  | 0.9973 | 1-250 |      |      |
| Fluopyram            | $y = 31485.4 x + 274109$  | 0.9972 | 1-250 | 0.30 | 0.84 |
|                      | $y = 159531 x + 995164$   | 0.9979 | 1-250 |      |      |
| Fluoxastrobin        | $y = 189716 x + 1098190$  | 0.9988 | 1-250 | 0.46 | 0.90 |
|                      | $y = 275546 x + 1622720$  | 0.9988 | 1-250 |      |      |
| Flusilazole          | $y = 305857 x + 2315090$  | 0.9976 | 1-250 | 0.14 | 0.91 |
|                      | $y = 133442 x + 550469$   | 0.9992 | 1-250 |      |      |
| Flutolanil           | $y = 146458 x + 721624$   | 0.9989 | 1-250 | 0.30 | 0.90 |
|                      | $y = 301441 x + 2412670$  | 0.9966 | 1-250 |      |      |
| Flutriafol           | $y = 333385 x + 2389380$  | 0.9984 | 1-250 | 0.31 | 0.71 |
|                      | $y = 29695.0 x + 44353.6$ | 0.9997 | 1-250 |      |      |
| Hexaconazole         | $y = 41757.2 x + 226352$  | 0.9991 | 1-250 | 0.25 | 1.02 |
|                      | $y = 65846.9 x + 140982$  | 0.9995 | 1-250 |      |      |
| Hexaflumuron         | $y = 64745.7 x + 399719$  | 0.9983 | 1-250 | 0.17 | 1.01 |
|                      | $y = 340100 x + 2463060$  | 0.9967 | 1-250 |      |      |
| Hexazinone           | $y = 337835 x + 2789150$  | 0.9972 | 1-250 | 0.27 | 0.34 |
|                      | $y = 257706 x + 232980$   | 0.9979 | 1-100 |      |      |
| 3-Hydroxy-carbofuran | $y = 768340 x + 1387410$  | 0.9996 | 1-100 | 1.76 | 0.39 |
|                      | $y = 8340.17 x - 18527.5$ | 0.9983 | 2-250 |      |      |
| Imazalil             | $y = 21261.4 x + 67880.3$ | 0.9998 | 2-250 | 0.18 | 0.82 |
|                      | $y = 75837.4 x + 448874$  | 0.9980 | 1-250 |      |      |
| Imidacloprid         | $y = 92868.5 x + 343302$  | 0.9988 | 1-250 | 0.23 | 0.57 |
|                      | $y = 45032.5 x + 101951$  | 0.9998 | 1-250 |      |      |
| Indoxacarb           | $y = 79673.5 x + 342956$  | 0.9992 | 1-250 | 0.55 | 1.06 |
|                      | $y = 19691.6 x + 77596.2$ | 0.9994 | 1-250 |      |      |

|                 |                           |        |       |      |      |
|-----------------|---------------------------|--------|-------|------|------|
| Ipconazole      | $y = 18648.3 x + 123693$  | 0.9969 | 1-250 | 0.15 | 0.88 |
|                 | $y = 156239 x + 364285$   | 0.9994 | 1-250 |      |      |
| Isoprocab       | $y = 178395 x + 768412$   | 0.9985 | 1-250 | 0.43 | 0.92 |
|                 | $y = 117130 x + 595832$   | 0.9978 | 1-250 |      |      |
| Kresoxim-methyl | $y = 126739 x + 933704$   | 0.9986 | 1-250 | 0.33 | 1.01 |
|                 | $y = 43902.0 x + 226791$  | 0.9974 | 1-250 |      |      |
| Lufenuron       | $y = 43423.6 x + 289101$  | 0.9974 | 1-250 | 0.84 | 0.92 |
|                 | $y = 10727.3 x + 121844$  | 0.9973 | 1-250 |      |      |
| Machette        | $y = 11683.4 x + 152160$  | 0.9943 | 1-250 | 0.14 | 1.01 |
|                 | $y = 197885 x + 1185040$  | 0.9981 | 1-250 |      |      |
| Malaaxon        | $y = 196230 x + 1188680$  | 0.9978 | 1-250 | 0.59 | 0.66 |
|                 | $y = 512867 x - 237645$   | 0.9969 | 1-100 |      |      |
| Malathion       | $y = 777428 x + 1903040$  | 0.9992 | 1-100 | 0.82 | 0.98 |
|                 | $y = 133554 x + 1216780$  | 0.9977 | 1-250 |      |      |
| Mepronil        | $y = 135705 x + 1538610$  | 0.9979 | 1-250 | 0.15 | 0.78 |
|                 | $y = 2978480 x + 2368610$ | 0.9977 | 1-20/ |      |      |
| Metalaxyl       | $y = 3839890 x + 2734280$ | 0.9993 | 1-100 | 0.25 | 0.79 |
|                 | $y = 627339 x + 747054$   | 0.9979 | 1-100 |      |      |
| Metalaxyl-M     | $y = 797536 x + 1731510$  | 0.9991 | 1-100 | 0.74 | 0.81 |
|                 | $y = 640190 x + 834499$   | 0.9983 | 1-100 |      |      |
| Methidathion    | $y = 792866 x + 1973550$  | 0.9990 | 1-100 | 0.60 | 0.83 |
|                 | $y = 27447.9 x + 109632$  | 0.9968 | 1-250 |      |      |
| Methomyl        | $y = 33184.7 x + 229958$  | 0.9964 | 1-250 | 0.13 | 0.95 |
|                 | $y = 67742.8 x + 56830.1$ | 0.9999 | 1-250 |      |      |
| Methoprene      | $y = 71661.7 x + 193993$  | 0.9996 | 1-250 | 0.57 | 1.01 |
|                 | $y = 27379.8 x + 67417.1$ | 0.9997 | 1-250 |      |      |
| Methoxyfenozide | $y = 27018.2 x + 138200$  | 0.9980 | 1-250 | 0.26 | 0.90 |
|                 | $y = 65893.0 x + 358492$  | 0.9989 | 1-250 |      |      |

|                    |                           |        |       |      |      |
|--------------------|---------------------------|--------|-------|------|------|
| Mevinphos          | $y = 72975.4 x + 455840$  | 0.9984 | 1-250 | 0.80 | 0.42 |
|                    | $y = 29522.0 x - 106846$  | 0.9981 | 2-250 |      |      |
| Monocrotophos      | $y = 70676.6 x + 155188$  | 0.9997 | 2-250 | 0.39 | 1.03 |
|                    | $y = 37547.1 x - 9640.81$ | 0.9996 | 1-250 |      |      |
| Myclobutanil       | $y = 36326.6 x + 59398.2$ | 0.9997 | 1-250 | 0.23 | 0.97 |
|                    | $y = 59482.8 x + 402701$  | 0.9970 | 1-250 |      |      |
| Omethoate          | $y = 61274.2 x + 590971$  | 0.9962 | 1-250 | 0.09 | 1.00 |
|                    | $y = 87078.9 x + 143419$  | 0.9997 | 1-250 |      |      |
| Paclobutrazol      | $y = 86878.8 x + 240660$  | 0.9995 | 1-250 | 0.18 | 0.82 |
|                    | $y = 299194 x + 1536100$  | 0.9986 | 1-250 |      |      |
| Penconazole        | $y = 366191 x + 2096590$  | 0.9988 | 1-250 | 0.11 | 0.98 |
|                    | $y = 90931.8 x + 493087$  | 0.9980 | 1-250 |      |      |
| Phenthoate         | $y = 92647.8 x + 648178$  | 0.9979 | 1-250 | 0.05 | 0.82 |
|                    | $y = 123757 x + 865286$   | 0.9984 | 1-250 |      |      |
| Phorate            | $y = 150919 x + 1088000$  | 0.9984 | 1-250 | 0.11 | 0.82 |
|                    | $y = 31248.4 x + 51345.5$ | 0.9998 | 1-250 |      |      |
| Phorate sulfone    | $y = 37916.5 x + 75618.0$ | 0.9993 | 1-250 | 0.83 | 0.76 |
|                    | $y = 30371.0 x + 142057$  | 0.9995 | 1-250 |      |      |
| Phosalone          | $y = 39917.1 x + 287688$  | 0.9986 | 1-250 | 1.56 | 0.94 |
|                    | $y = 1245400 x + 2215450$ | 0.9986 | 1-100 |      |      |
| Phosfolan          | $y = 1325190 x + 2320790$ | 0.9984 | 1-100 | 0.15 | 0.68 |
|                    | $y = 242047 x - 414556$   | 0.9988 | 1-250 |      |      |
| Phosphamidon       | $y = 353707 x + 1927950$  | 0.9993 | 1-250 | 0.22 | 0.67 |
|                    | $y = 96171.0 x - 143984$  | 0.9989 | 1-250 |      |      |
| Piperonyl butoxide | $y = 143170 x + 102740$   | 0.9998 | 1-250 | 0.24 | 1.00 |
|                    | $y = 313403 x + 1740420$  | 0.9987 | 1-250 |      |      |
| Pirimicarb         | $y = 313792 x + 1849940$  | 0.9976 | 1-250 | 0.11 | 0.91 |
|                    | $y = 310620 x + 606324$   | 0.9998 | 1-250 |      |      |

|                   |                           |        |       |      |      |
|-------------------|---------------------------|--------|-------|------|------|
| Pirimiphos-methyl | $y = 339671 x + 1637580$  | 0.9994 | 1-250 | 0.09 | 0.87 |
|                   | $y = 280682 x + 574881$   | 0.9996 | 1-250 |      |      |
| Prochloraz        | $y = 321052 x + 1858120$  | 0.9977 | 1-250 | 0.18 | 0.95 |
|                   | $y = 145779 x + 590929$   | 0.9988 | 1-250 |      |      |
| Profenofos        | $y = 153835 x + 1028100$  | 0.9984 | 1-250 | 0.09 | 0.95 |
|                   | $y = 96052.8 x + 575749$  | 0.9987 | 1-250 |      |      |
| Propamocarb       | $y = 100949 x + 465548$   | 0.9989 | 1-250 | 0.16 | 1.25 |
|                   | $y = 258519 x - 148645$   | 0.9997 | 1-250 |      |      |
| Propiconazole     | $y = 206167 x - 219273$   | 0.9996 | 1-250 | 0.17 | 0.93 |
|                   | $y = 91728.3 x + 604260$  | 0.9980 | 1-250 |      |      |
| Pyraclostrobin    | $y = 98529.3 x + 664585$  | 0.9977 | 1-250 | 0.21 | 0.94 |
|                   | $y = 170554 x + 628197$   | 0.9989 | 1-250 |      |      |
| Pyridaben         | $y = 181948 x + 753832$   | 0.9993 | 1-250 | 0.15 | 0.96 |
|                   | $y = 347266 x + 2093940$  | 0.9977 | 1-250 |      |      |
| Pyridafenthion    | $y = 360922 x + 3184610$  | 0.9919 | 1-250 | 0.86 | 0.93 |
|                   | $y = 157547 x + 1223090$  | 0.9970 | 1-250 |      |      |
| Pyrimitate        | $y = 170224 x + 1467230$  | 0.9976 | 1-250 | 0.13 | 0.75 |
|                   | $y = 940503 x + 1626720$  | 0.9977 | 1-100 |      |      |
| Pyrisoxazole      | $y = 1245920 x + 367730$  | 0.9997 | 1-100 | 0.22 | 0.93 |
|                   | $y = 24312.0 x + 74387.8$ | 0.9982 | 1-250 |      |      |
| Simeconazole      | $y = 26076.3 x + 108653$  | 0.9987 | 1-250 | 0.11 | 0.85 |
|                   | $y = 299211 x + 1492180$  | 0.9989 | 1-250 |      |      |
| Spirodiclofen     | $y = 353108 x + 2471750$  | 0.9976 | 1-250 | 0.12 | 1.00 |
|                   | $y = 43942.2 x + 111706$  | 0.9985 | 1-250 |      |      |
| Sulfotep          | $y = 43952.5 x + 194879$  | 0.9984 | 1-250 | 0.06 | 0.90 |
|                   | $y = 201714 x + 1149350$  | 0.9986 | 1-250 |      |      |
| Sulprofos         | $y = 223151 x + 1500600$  | 0.9968 | 1-250 | 0.31 | 0.96 |
|                   | $y = 81372.2 x + 797934$  | 0.9968 | 1-250 |      |      |



|                    |                          |        |       |      |      |
|--------------------|--------------------------|--------|-------|------|------|
|                    | $y = 85161.1 x + 763653$ | 0.9976 | 1-250 |      |      |
| Tebuconazole       | $y = 147481 x + 469067$  | 0.9973 | 1-250 | 0.17 | 0.94 |
|                    | $y = 156376 x + 1092590$ | 0.9961 | 1-250 |      |      |
| Tebufenozide       | $y = 56077.0 x + 118687$ | 0.9994 | 1-250 | 1.68 | 0.91 |
|                    | $y = 61535.3 x + 320772$ | 0.9979 | 1-250 |      |      |
| Tebufenpyrad       | $y = 94525.5 x + 378735$ | 0.9993 | 1-250 | 0.16 | 1.02 |
|                    | $y = 92916.7 x + 528019$ | 0.9965 | 1-250 |      |      |
| Temephos           | $y = 326104 x + 2560530$ | 0.9981 | 1-250 | 0.11 | 0.95 |
|                    | $y = 343536 x + 2610770$ | 0.9969 | 1-250 |      |      |
| Terbufos           | $y = 12673.1 x + 140017$ | 0.9960 | 2-250 | 1.01 | 1.00 |
|                    | $y = 12725.3 x + 140710$ | 0.9965 | 2-250 |      |      |
| Tetrachlorvinphos  | $y = 34401.6 x + 178660$ | 0.9987 | 1-250 | 0.12 | 0.98 |
|                    | $y = 35145.0 x + 256671$ | 0.9972 | 1-250 |      |      |
| Tetraconazole      | $y = 164884 x + 297149$  | 0.9997 | 1-250 | 0.07 | 0.90 |
|                    | $y = 182889 x + 950755$  | 0.9989 | 1-250 |      |      |
| Thiacloprid        | $y = 335009 x + 366369$  | 0.9994 | 1-100 | 0.33 | 0.52 |
|                    | $y = 649638 x + 824747$  | 0.9996 | 1-100 |      |      |
| Thiamethoxam       | $y = 114790 x + 259243$  | 0.9999 | 1-250 | 0.08 | 0.86 |
|                    | $y = 133709 x + 386705$  | 0.9998 | 1-250 |      |      |
| Thiophanate-methyl | $y = 143721 x - 266221$  | 0.9987 | 1-250 | 0.12 | 0.49 |
|                    | $y = 295481 x + 984774$  | 0.9995 | 1-250 |      |      |
| Tolfenpyrad        | $y = 90058.0 x + 612117$ | 0.9981 | 1-250 | 0.11 | 0.89 |
|                    | $y = 101463 x + 557008$  | 0.9988 | 1-250 |      |      |
| Triadimefon        | $y = 43441.4 x + 427493$ | 0.9984 | 2-250 | 1.52 | 0.92 |
|                    | $y = 46994.8 x + 450105$ | 0.9987 | 2-250 |      |      |
| Triadimenol        | $y = 37087.1 x + 135671$ | 0.9990 | 1-250 | 1.32 | 0.95 |
|                    | $y = 39055.2 x + 144867$ | 0.9995 | 1-250 |      |      |
| Trifloxystrobin    | $y = 462954 x + 610327$  | 0.9996 | 1-100 | 1.22 | 0.72 |

|               |                           |        |       |      |      |
|---------------|---------------------------|--------|-------|------|------|
| Triticonazole | $y = 646293 x + 726873$   | 0.9996 | 1-100 | 0.23 | 0.77 |
|               | $y = 76368.4 x + 298187$  | 0.9993 | 1-250 |      |      |
| Uniconazole   | $y = 99459.4 x + 431537$  | 0.9986 | 1-250 | 0.12 | 0.85 |
|               | $y = 165721 x + 467852$   | 0.9995 | 1-250 |      |      |
| Vitavax       | $y = 194158 x + 795576$   | 0.9994 | 1-250 | 0.12 | 0.40 |
|               | $y = 1406400 x + 1784080$ | 0.9966 | 1-100 |      |      |
|               | $y = 3487430 x + 2053310$ | 0.9985 | 1-100 |      |      |

<sup>1</sup> Calibration curves are expressed as regression lines ( $y = a x + b$ ), where y is the peak area and x is the concentration ( $\mu\text{g L}^{-1}$ ), a is the slope, b is the intercept and R is the correlation coefficient.

<sup>2</sup> The first calibration curve for each pesticide represents the matrix-matched calibration curve.

<sup>3</sup> The second calibration curve for each pesticide represents the solvent standard calibration curve.

**Table S5 The linearity, LOD and ME of each pesticide in FD.**

| Pesticides    | $^1y=a x+b$                 | R      | Linear range,<br>$\mu\text{g L}^{-1}$ | LOD,<br>$\mu\text{g L}^{-1}$ | ME   |
|---------------|-----------------------------|--------|---------------------------------------|------------------------------|------|
| Acephate      | $^2y = 67806.2 x - 7139.02$ | 0.9996 | 1-250                                 | 0.16                         | 0.71 |
|               | $^3y = 95454.7 x + 126007$  | 0.9998 | 1-250                                 |                              |      |
| Acetamiprid   | $y = 93931.6 x + 220641$    | 0.9997 | 1-250                                 | 0.18                         | 0.43 |
|               | $y = 216310 x + 859034$     | 0.9996 | 1-250                                 |                              |      |
| Alachlor      | $y = 1253120 x + 2690540$   | 0.9987 | 1-100                                 | 0.88                         | 0.95 |
|               | $y = 1319150 x + 3664510$   | 0.9956 | 1-100                                 |                              |      |
| Atrazine      | $y = 118439 x + 640960$     | 0.9972 | 1-250                                 | 0.29                         | 0.73 |
|               | $y = 163204 x + 1200030$    | 0.9981 | 1-250                                 |                              |      |
| Avermectin    | $y = 11652.9 x + 70367.9$   | 0.9977 | 1-250                                 | 1.26                         | 0.74 |
|               | $y = 15804.3 x + 78893.4$   | 0.9978 | 1-250                                 |                              |      |
| Azaconazole   | $y = 227372 x + 1156260$    | 0.9972 | 1-250                                 | 0.68                         | 0.86 |
|               | $y = 264001 x + 1277940$    | 0.9993 | 1-250                                 |                              |      |
| Azamethiphos  | $y = 51824.4 x + 173020$    | 0.9971 | 1-250                                 | 0.26                         | 0.58 |
|               | $y = 88694.2 x - 180974$    | 0.9985 | 1-250                                 |                              |      |
| Azoxystrobin  | $y = 663961 x + 712863$     | 0.9997 | 1-100                                 | 0.83                         | 0.87 |
|               | $y = 758953 x + 1340200$    | 0.9989 | 1-100                                 |                              |      |
| Benalaxyl     | $y = 117499 x + 617712$     | 0.9986 | 1-250                                 | 0.22                         | 0.78 |
|               | $y = 149996 x + 734635$     | 0.9988 | 1-250                                 |                              |      |
| Bendiocarb    | $y = 53028.4 x + 199417$    | 0.9993 | 1-250                                 | 0.30                         | 0.54 |
|               | $y = 98646.2 x + 217493$    | 0.9996 | 1-250                                 |                              |      |
| Bitertanol    | $y = 11914.9 x + 38177.2$   | 0.9992 | 1-250                                 | 1.07                         | 1.09 |
|               | $y = 10941.0 x + 27922.0$   | 0.9991 | 1-250                                 |                              |      |
| Bromuconazole | $y = 36174.5 x + 54471.2$   | 0.9992 | 1-250                                 | 2.59                         | 1.02 |
|               | $y = 35549.1 x + 205283$    | 0.9991 | 1-250                                 |                              |      |
| Buprofezin    | $y = 294688 x + 1536460$    | 0.9962 | 1-250                                 | 0.05                         | 0.99 |

|                     |                           |        |       |      |      |
|---------------------|---------------------------|--------|-------|------|------|
|                     | $y = 296179 x + 1739250$  | 0.9981 | 1-250 |      |      |
| Cadusafos           | $y = 269756 x + 1103120$  | 0.9992 | 1-250 | 1.01 | 0.88 |
|                     | $y = 305975 x + 1489500$  | 0.9990 | 1-250 |      |      |
| Carbendazim         | $y = 225306 x + 648281$   | 0.9996 | 1-250 | 0.21 | 0.70 |
|                     | $y = 320186 x + 1825120$  | 0.9988 | 1-250 |      |      |
| Carbofuran          | $y = 129359 x + 474898$   | 0.9976 | 1-250 | 0.32 | 0.41 |
|                     | $y = 315291 x + 1980730$  | 0.9990 | 1-250 |      |      |
| Chlorantraniliprole | $y = 55423.8 x + 237239$  | 0.9990 | 1-250 | 0.83 | 0.91 |
|                     | $y = 60806.5 x + 374502$  | 0.9984 | 1-250 |      |      |
| Chlorpyrifos        | $y = 984924 x + 1727480$  | 0.9980 | 1-100 | 0.15 | 0.84 |
|                     | $y = 1170180 x + 1250410$ | 0.9991 | 1-100 |      |      |
| Chlortoluron        | $y = 159242 x + 772193$   | 0.9985 | 1-250 | 0.22 | 0.71 |
|                     | $y = 224329 x + 1248420$  | 0.9994 | 1-250 |      |      |
| Clothianidin        | $y = 41334.4 x + 33322.1$ | 0.9998 | 1-250 | 0.11 | 0.62 |
|                     | $y = 66466.1 x + 259289$  | 0.9995 | 1-250 |      |      |
| Coumaphos           | $y = 160608 x + 1044170$  | 0.9985 | 1-250 | 0.07 | 0.85 |
|                     | $y = 187969 x + 1204260$  | 0.9983 | 1-250 |      |      |
| Cyanofenphos        | $y = 33187.8 x + 234269$  | 0.9978 | 1-250 | 0.18 | 0.87 |
|                     | $y = 38061.2 x + 194748$  | 0.9990 | 1-250 |      |      |
| Cyazofamid          | $y = 50740.0 x + 388912$  | 0.9976 | 1-250 | 0.11 | 0.60 |
|                     | $y = 84102.7 x + 400697$  | 0.9995 | 1-250 |      |      |
| Cyproconazole       | $y = 142246 x + 671284$   | 0.9977 | 1-250 | 0.14 | 0.88 |
|                     | $y = 161982 x + 841769$   | 0.9989 | 1-250 |      |      |
| Dicrotophos         | $y = 54428.7 x + 30376.8$ | 0.9997 | 1-250 | 0.19 | 0.95 |
|                     | $y = 57100.5 x + 80168.3$ | 0.9999 | 1-250 |      |      |
| Difenoconazole      | $y = 148109 x + 180322$   | 0.9999 | 1-250 | 0.10 | 1.00 |
|                     | $y = 147556 x + 675191$   | 0.9984 | 1-250 |      |      |
| Dimethoate          | $y = 126041 x + 440503$   | 0.9988 | 1-250 | 0.29 | 0.52 |

|                      |                           |        |       |      |      |
|----------------------|---------------------------|--------|-------|------|------|
|                      | $y = 240641 x + 586878$   | 0.9998 | 1-250 |      |      |
| Dimethomorph         | $y = 208965 x + 580490$   | 0.9990 | 1-250 | 0.14 | 0.98 |
|                      | $y = 212219 x + 858828$   | 0.9991 | 1-250 |      |      |
| Dimethyl phthalate   | $y = 63283.3 x + 1927150$ | 0.9974 | 1-250 | 1.33 | 0.51 |
|                      | $y = 125246 x + 2067560$  | 0.9999 | 1-250 |      |      |
| Diniconazole         | $y = 48457.6 x + 198578$  | 0.9974 | 1-250 | 0.19 | 0.89 |
|                      | $y = 54617.9 x + 134041$  | 0.9997 | 1-250 |      |      |
| Dinotefuran          | $y = 58085.6 x + 49799.7$ | 0.9998 | 1-250 | 0.13 | 0.92 |
|                      | $y = 63144.0 x + 193831$  | 0.9997 | 1-250 |      |      |
| Emamectin Benzoate   | $y = 333395 x + 688468$   | 0.9989 | 1-250 | 0.44 | 1.02 |
|                      | $y = 325660 x + 628673$   | 0.9994 | 1-250 |      |      |
| Epoxiconazol         | $y = 116415 x + 614516$   | 0.9991 | 1-250 | 0.18 | 1.02 |
|                      | $y = 114171 x + 775284$   | 0.9975 | 1-250 |      |      |
| Ethiofencarb         | $y = 1105010 x + 1035670$ | 0.9983 | 1-100 | 0.44 | 0.75 |
|                      | $y = 1478020 x + 2025200$ | 0.9990 | 1-100 |      |      |
| Ethofenprox          | $y = 267762 x + 740671$   | 0.9993 | 1-250 | 0.12 | 1.01 |
|                      | $y = 263965 x + 864543$   | 0.9987 | 1-250 |      |      |
| Etoxazole            | $y = 737336 x + 1671050$  | 0.9989 | 1-100 | 0.24 | 0.97 |
|                      | $y = 758833 x + 1867190$  | 0.9985 | 1-100 |      |      |
| Fenamiphos           | $y = 325909 x + 3253420$  | 0.9962 | 1-250 | 0.58 | 0.96 |
|                      | $y = 339535 x + 3259620$  | 0.9975 | 1-250 |      |      |
| Fenamiphos sulfoxide | $y = 79340.1 x + 396890$  | 0.9976 | 1-250 | 0.28 | 0.60 |
|                      | $y = 133042 x + 550303$   | 0.9994 | 1-250 |      |      |
| Fenbuconazole        | $y = 72215.0 x + 42991.2$ | 0.9991 | 1-250 | 0.25 | 1.07 |
|                      | $y = 67466.4 x + 287280$  | 0.9996 | 1-250 |      |      |
| Fenpropathrin        | $y = 9545.82 x + 64136.3$ | 0.9974 | 2-250 | 0.90 | 0.95 |
|                      | $y = 10089.5 x + 53148.5$ | 0.9988 | 2-250 |      |      |
| Fipronil             | $y = 10696.3 x + 16162.5$ | 0.9994 | 1-250 | 0.56 | 0.98 |

|                      |                           |        |       |      |      |
|----------------------|---------------------------|--------|-------|------|------|
| Fipronil-sulfone     | $y = 10861.0 x + 47921.3$ | 0.9971 | 1-250 | 0.53 | 0.98 |
|                      | $y = 182705 x - 306552$   | 0.9980 | 1-250 |      |      |
| Fludioxonil          | $y = 187287 x + 361756$   | 0.9993 | 1-250 | 0.10 | 0.97 |
|                      | $y = 30562.0 x + 222403$  | 0.9972 | 1-250 |      |      |
| Fluopyram            | $y = 31485.4 x + 274109$  | 0.9972 | 1-250 | 0.16 | 0.92 |
|                      | $y = 174970 x + 650091$   | 0.9989 | 1-250 |      |      |
| Fluoxastrobin        | $y = 189716 x + 1098190$  | 0.9988 | 1-250 | 0.20 | 0.95 |
|                      | $y = 289759 x + 1491470$  | 0.9987 | 1-250 |      |      |
| Flusilazole          | $y = 305857 x + 2315090$  | 0.9976 | 1-250 | 0.21 | 0.87 |
|                      | $y = 128148 x + 444292$   | 0.9994 | 1-250 |      |      |
| Flutolanil           | $y = 146458 x + 721624$   | 0.9989 | 1-250 | 0.50 | 0.94 |
|                      | $y = 313102 x + 1185610$  | 0.9981 | 1-250 |      |      |
| Flutriafol           | $y = 333385 x + 2389380$  | 0.9984 | 1-250 | 0.32 | 0.67 |
|                      | $y = 27789.9 x + 142913$  | 0.9989 | 1-250 |      |      |
| Hexaconazole         | $y = 41757.2 x + 226352$  | 0.9991 | 1-250 | 0.24 | 0.83 |
|                      | $y = 53825.9 x + 299357$  | 0.9982 | 1-250 |      |      |
| Hexaflumuron         | $y = 64745.7 x + 399719$  | 0.9983 | 1-250 | 0.11 | 0.94 |
|                      | $y = 318013 x + 2253280$  | 0.9965 | 1-250 |      |      |
| Hexazinone           | $y = 337835 x + 2789150$  | 0.9972 | 1-250 | 0.42 | 0.32 |
|                      | $y = 244642 x + 80326.2$  | 0.9985 | 1-100 |      |      |
| 3-Hydroxy-carbofuran | $y = 768340 x + 1387410$  | 0.9996 | 1-100 | 0.89 | 0.51 |
|                      | $y = 10814.3 x + 19959.1$ | 0.9999 | 2-250 |      |      |
| Imazalil             | $y = 21261.4 x + 67880.3$ | 0.9998 | 2-250 | 0.90 | 0.91 |
|                      | $y = 84788.7 x - 67927.8$ | 0.9996 | 1-250 |      |      |
| Imidacloprid         | $y = 92868.5 x + 343302$  | 0.9988 | 1-250 | 0.14 | 0.72 |
|                      | $y = 57399.2 x + 197573$  | 0.9994 | 1-250 |      |      |
| Indoxacarb           | $y = 79673.5 x + 342956$  | 0.9992 | 1-250 | 0.29 | 1.17 |
|                      | $y = 21757.7 x + 41414.0$ | 0.9995 | 1-250 |      |      |

|                 |                           |        |       |      |      |
|-----------------|---------------------------|--------|-------|------|------|
|                 | $y = 18648.3 x + 123693$  | 0.9969 | 1-250 |      |      |
| Ipconazole      | $y = 172626 x + 73562.0$  | 0.9997 | 1-250 | 0.19 | 0.97 |
|                 | $y = 178395 x + 768412$   | 0.9985 | 1-250 |      |      |
| Isoprocab       | $y = 99757.8 x + 741441$  | 0.9961 | 1-250 | 0.28 | 0.79 |
|                 | $y = 126739 x + 933704$   | 0.9986 | 1-250 |      |      |
| Kresoxim-methyl | $y = 46639.2 x + 93053.1$ | 0.9991 | 1-250 | 0.61 | 1.07 |
|                 | $y = 43423.6 x + 289101$  | 0.9974 | 1-250 |      |      |
| Lufenuron       | $y = 10389.1 x + 127797$  | 0.9963 | 1-250 | 1.52 | 0.89 |
|                 | $y = 11683.4 x + 152160$  | 0.9943 | 1-250 |      |      |
| Machette        | $y = 194649 x + 871311$   | 0.9993 | 1-250 | 0.24 | 0.99 |
|                 | $y = 196230 x + 1188680$  | 0.9978 | 1-250 |      |      |
| Malaoxon        | $y = 443351 x + 221032$   | 0.9980 | 1-100 | 0.24 | 0.57 |
|                 | $y = 777428 x + 1903040$  | 0.9992 | 1-100 |      |      |
| Malathion       | $y = 112295 x + 1533350$  | 0.9961 | 1-250 | 0.98 | 0.83 |
|                 | $y = 135705 x + 1538610$  | 0.9979 | 1-250 |      |      |
| Mepronil        | $y = 3451270 x + 380017$  | 0.9966 | 1-100 | 0.24 | 0.90 |
|                 | $y = 3839890 x + 2734280$ | 0.9993 | 1-100 |      |      |
| Metalaxyl       | $y = 639745 x + 1188510$  | 0.9983 | 1-100 | 0.52 | 0.80 |
|                 | $y = 797536 x + 1731510$  | 0.9991 | 1-100 |      |      |
| Metalaxyl-M     | $y = 648931 x + 1147860$  | 0.9987 | 1-100 | 0.31 | 0.82 |
|                 | $y = 792866 x + 1973550$  | 0.9990 | 1-100 |      |      |
| Methidathion    | $y = 24284.8 x + 181172$  | 0.9960 | 1-250 | 1.71 | 0.73 |
|                 | $y = 33184.7 x + 229958$  | 0.9964 | 1-250 |      |      |
| Methomyl        | $y = 63359.5 x + 60103.7$ | 0.9997 | 1-250 | 0.07 | 0.88 |
|                 | $y = 71661.7 x + 193993$  | 0.9996 | 1-250 |      |      |
| Methoprene      | $y = 25603.7 x + 94951.4$ | 0.9988 | 1-250 | 0.53 | 0.95 |
|                 | $y = 27018.2 x + 138200$  | 0.9980 | 1-250 |      |      |
| Methoxyfenozide | $y = 77538.8 x + 301497$  | 0.9987 | 2-250 | 0.55 | 1.07 |

|                    |                           |        |       |      |      |
|--------------------|---------------------------|--------|-------|------|------|
|                    | $y = 72520.7 x + 535238$  | 0.9985 | 2-250 |      |      |
| Mevinphos          | $y = 36183.8 x + 85649.8$ | 0.9992 | 2-250 | 0.44 | 0.51 |
|                    | $y = 70676.6 x + 155188$  | 0.9997 | 2-250 |      |      |
| Monocrotophos      | $y = 33127.1 x + 53348.9$ | 0.9997 | 1-250 | 0.37 | 0.91 |
|                    | $y = 36326.6 x + 59398.2$ | 0.9997 | 1-250 |      |      |
| Myclobutanil       | $y = 61544.1 x + 488798$  | 0.9963 | 1-250 | 0.32 | 1.00 |
|                    | $y = 61274.2 x + 590971$  | 0.9962 | 1-250 |      |      |
| Omethoate          | $y = 81508.3 x + 61656.9$ | 0.9998 | 1-250 | 0.10 | 0.94 |
|                    | $y = 86878.8 x + 240660$  | 0.9995 | 1-250 |      |      |
| Paclobutrazol      | $y = 315465 x + 1293340$  | 0.9980 | 1-250 | 0.10 | 0.86 |
|                    | $y = 366191 x + 2096590$  | 0.9988 | 1-250 |      |      |
| Penconazole        | $y = 72818.3 x + 354940$  | 0.9994 | 1-250 | 0.23 | 0.79 |
|                    | $y = 92647.8 x + 648178$  | 0.9979 | 1-250 |      |      |
| Phenthoate         | $y = 117291 x + 869493$   | 0.9979 | 1-250 | 0.15 | 0.78 |
|                    | $y = 150919 x + 1088000$  | 0.9984 | 1-250 |      |      |
| Phorate            | $y = 25567.0 x + 68696.6$ | 0.9994 | 1-250 | 0.24 | 0.67 |
|                    | $y = 37916.5 x + 75618.0$ | 0.9993 | 1-250 |      |      |
| Phorate sulfone    | $y = 27847.0 x + 345853$  | 0.9978 | 5-250 | 0.93 | 0.71 |
|                    | $y = 39237.9 x + 407020$  | 0.9994 | 5-250 |      |      |
| Phosalone          | $y = 1156490 x + 1415210$ | 0.9992 | 1-100 | 0.67 | 0.87 |
|                    | $y = 1325190 x + 2320790$ | 0.9984 | 1-100 |      |      |
| Phosfolan          | $y = 277856 x + 697510$   | 0.9990 | 1-250 | 0.18 | 0.79 |
|                    | $y = 353707 x + 1927950$  | 0.9993 | 1-250 |      |      |
| Phosphamidon       | $y = 99382.7 x + 129213$  | 0.9996 | 1-250 | 0.28 | 0.69 |
|                    | $y = 143170 x + 102740$   | 0.9998 | 1-250 |      |      |
| Piperonyl butoxide | $y = 314310 x + 1620890$  | 0.9982 | 1-250 | 0.12 | 1.00 |
|                    | $y = 313792 x + 1849940$  | 0.9976 | 1-250 |      |      |
| Pirimicarb         | $y = 303829 x + 716498$   | 0.9986 | 1-250 | 0.08 | 0.89 |



|                   |                           |        |       |      |      |
|-------------------|---------------------------|--------|-------|------|------|
| Pirimiphos-methyl | $y = 339671 x + 1637580$  | 0.9994 | 1-250 | 0.16 | 0.81 |
|                   | $y = 261259 x + 559621$   | 0.9988 | 1-250 |      |      |
| Prochloraz        | $y = 321052 x + 1858120$  | 0.9977 | 1-250 | 0.18 | 1.00 |
|                   | $y = 154104 x + 130468$   | 0.9999 | 1-250 |      |      |
| Profenofos        | $y = 153835 x + 1028100$  | 0.9984 | 1-250 | 0.13 | 0.92 |
|                   | $y = 92962.4 x + 595027$  | 0.9982 | 1-250 |      |      |
| Propamocarb       | $y = 100949 x + 465548$   | 0.9989 | 1-250 | 0.14 | 1.20 |
|                   | $y = 248360 x - 196874$   | 0.9995 | 1-250 |      |      |
| Propiconazole     | $y = 206167 x - 219273$   | 0.9996 | 1-250 | 0.15 | 0.98 |
|                   | $y = 96650.3 x + 581100$  | 0.9971 | 1-250 |      |      |
| Pyraclostrobin    | $y = 98529.3 x + 664585$  | 0.9977 | 1-250 | 0.19 | 1.07 |
|                   | $y = 194122 x + 216011$   | 0.9998 | 1-250 |      |      |
| Pyridaben         | $y = 181948 x + 753832$   | 0.9993 | 1-250 | 0.13 | 0.95 |
|                   | $y = 343777 x + 1888040$  | 0.9988 | 1-250 |      |      |
| Pyridafenthion    | $y = 360922 x + 3184610$  | 0.9919 | 1-250 | 1.10 | 1.11 |
|                   | $y = 189532 x + 1166240$  | 0.9963 | 1-250 |      |      |
| Pyrimitate        | $y = 170224 x + 1467230$  | 0.9976 | 1-250 | 0.31 | 0.81 |
|                   | $y = 1011580 x + 599577$  | 0.9995 | 1-100 |      |      |
| Pyrisoxazole      | $y = 1245920 x + 367730$  | 0.9997 | 1-100 | 0.24 | 0.95 |
|                   | $y = 24746.1 x + 59031.7$ | 0.9995 | 1-250 |      |      |
| Simeconazole      | $y = 26076.3 x + 108653$  | 0.9987 | 1-250 | 0.15 | 0.90 |
|                   | $y = 317073 x + 1264780$  | 0.9986 | 1-250 |      |      |
| Spirodiclofen     | $y = 353108 x + 2471750$  | 0.9976 | 1-250 | 0.21 | 0.99 |
|                   | $y = 43548.4 x + 109356$  | 0.9993 | 1-250 |      |      |
| Sulfotep          | $y = 43952.5 x + 194879$  | 0.9984 | 1-250 | 0.12 | 1.06 |
|                   | $y = 236375 x + 686357$   | 0.9982 | 1-250 |      |      |
| Sulprofos         | $y = 223151 x + 1500600$  | 0.9968 | 1-250 | 0.42 | 0.95 |
|                   | $y = 81204.1 x + 796898$  | 0.9970 | 1-250 |      |      |

|                    |                          |        |       |      |      |
|--------------------|--------------------------|--------|-------|------|------|
|                    | $y = 85161.1 x + 763653$ | 0.9976 | 1-250 |      |      |
| Tebuconazole       | $y = 127516 x + 486203$  | 0.9990 | 1-250 | 0.13 | 0.82 |
|                    | $y = 156376 x + 1092590$ | 0.9961 | 1-250 |      |      |
| Tebufenozide       | $y = 51176.4 x + 279101$ | 0.9978 | 1-250 | 0.44 | 0.83 |
|                    | $y = 61535.3 x + 320772$ | 0.9979 | 1-250 |      |      |
| Tebufenpyrad       | $y = 93311.2 x + 390575$ | 0.9985 | 1-250 | 0.18 | 1.00 |
|                    | $y = 92916.7 x + 528019$ | 0.9965 | 1-250 |      |      |
| Temephos           | $y = 337370 x + 2728750$ | 0.9965 | 1-250 | 0.10 | 0.98 |
|                    | $y = 343536 x + 2610770$ | 0.9969 | 1-250 |      |      |
| Terbufos           | $y = 12232.0 x + 133083$ | 0.9965 | 2-250 | 1.62 | 0.96 |
|                    | $y = 12725.3 x + 140710$ | 0.9965 | 2-250 |      |      |
| Tetrachlorvinphos  | $y = 29380.5 x + 243573$ | 0.9968 | 1-250 | 0.03 | 0.84 |
|                    | $y = 35145.0 x + 256671$ | 0.9972 | 1-250 |      |      |
| Tetraconazole      | $y = 150468 x + 365481$  | 0.9993 | 1-250 | 0.25 | 0.82 |
|                    | $y = 182889 x + 950755$  | 0.9989 | 1-250 |      |      |
| Thiacloprid        | $y = 418696 x + 452817$  | 0.9993 | 1-100 | 0.88 | 0.64 |
|                    | $y = 649638 x + 824747$  | 0.9996 | 1-100 |      |      |
| Thiamethoxam       | $y = 114170 x + 118094$  | 0.9998 | 1-250 | 0.04 | 0.85 |
|                    | $y = 133709 x + 386705$  | 0.9998 | 1-250 |      |      |
| Thiophanate-methyl | $y = 145929 x + 725037$  | 0.9979 | 1-250 | 0.11 | 0.49 |
|                    | $y = 295481 x + 984774$  | 0.9995 | 1-250 |      |      |
| Tolfenpyrad        | $y = 93800.8 x + 576177$ | 0.9978 | 1-250 | 0.06 | 0.92 |
|                    | $y = 101463 x + 557008$  | 0.9988 | 1-250 |      |      |
| Triadimefon        | $y = 46025.2 x + 495280$ | 0.9983 | 2-250 | 1.77 | 0.98 |
|                    | $y = 46994.8 x + 450105$ | 0.9987 | 2-250 |      |      |
| Triadimenol        | $y = 37972.1 x + 125791$ | 0.9992 | 1-250 | 0.96 | 0.97 |
|                    | $y = 39055.2 x + 144867$ | 0.9995 | 1-250 |      |      |
| Trifloxystrobin    | $y = 376473 x + 619709$  | 0.9993 | 1-100 | 0.62 | 0.58 |

|               |                           |        |       |      |      |
|---------------|---------------------------|--------|-------|------|------|
| Triticonazole | $y = 646293 x + 726873$   | 0.9996 | 1-100 | 0.77 | 1.01 |
|               | $y = 100310 x - 66743.8$  | 0.9993 | 1-250 |      |      |
| Uniconazole   | $y = 99459.4 x + 431537$  | 0.9986 | 1-250 | 0.17 | 0.80 |
|               | $y = 156093 x + 718396$   | 0.9973 | 1-250 |      |      |
| Vitavax       | $y = 194158 x + 795576$   | 0.9994 | 1-250 | 0.21 | 0.49 |
|               | $y = 1694970 x - 575122$  | 0.9995 | 1-100 |      |      |
|               | $y = 3487430 x + 2053310$ | 0.9985 | 1-100 |      |      |

<sup>1</sup> Calibration curves are expressed as regression lines ( $y = a x + b$ ), where y is the peak area and x is the concentration ( $\mu\text{g L}^{-1}$ ), a is the slope, b is the intercept and R is the correlation coefficient.

<sup>2</sup> The first calibration curve for each pesticide represents the matrix-matched calibration curve.

<sup>3</sup> The second calibration curve for each pesticide represents the solvent standard calibration curve.

**Table S6 Recoveries of the pesticides at spiked concentrations of 30, 120, and 240  $\mu\text{g kg}^{-1}$  in the FT samples.**

| Spiked concentration | 30 $\mu\text{g kg}^{-1}$ |        | 120 $\mu\text{g kg}^{-1}$ |        | 240 $\mu\text{g kg}^{-1}$ |        |
|----------------------|--------------------------|--------|---------------------------|--------|---------------------------|--------|
|                      | Recovery(%)              | RSD(%) | Recovery(%)               | RSD(%) | Recovery(%)               | RSD(%) |
| Acephate             | 76.2                     | 5      | 83.7                      | 0.4    | 75.7                      | 2      |
| Acetamiprid          | 82.4                     | 3      | 81.9                      | 6      | 75.5                      | 3      |
| Alachlor             | 97.6                     | 3      | 99.2                      | 2      | 93.7                      | 0.5    |
| Atrazine             | 99.5                     | 5      | 93.9                      | 2      | 87.0                      | 2      |
| Avermectin           | 90.8                     | 5      | 103                       | 3      | 77.5                      | 2      |
| Azaconazole          | 93.6                     | 7      | 92.0                      | 3      | 85.5                      | 3      |
| Azamethiphos         | 85.8                     | 2      | 96.4                      | 8      | 76.4                      | 5      |
| Azoxystrobin         | 98.8                     | 5      | 94.4                      | 4      | 86.7                      | 4      |
| Benalaxyl            | 91.5                     | 2      | 102                       | 0.4    | 97.6                      | 4      |
| Bendiocarb           | 75.3                     | 5      | 105                       | 9      | 93.8                      | 1      |
| Bitertanol           | 103                      | 7      | 98.6                      | 2      | 93.6                      | 3      |
| Bromuconazole        | 93.4                     | 8      | 92.4                      | 3      | 86.5                      | 6      |
| Buprofezin           | 102                      | 2      | 96.2                      | 1      | 95.5                      | 7      |
| Cadusafos            | 93.0                     | 5      | 99.5                      | 3      | 102                       | 4      |
| Carbendazim          | 109                      | 20     | 81.3                      | 8      | 79.6                      | 7      |
| Carbofuran           | 71.1                     | 13     | 95.3                      | 0.4    | 88.3                      | 3      |
| Chlorantraniliprole  | 84.1                     | 18     | 81.3                      | 3      | 91.9                      | 8      |
| Chlorpyrifos         | 96.7                     | 1      | 94.8                      | 1      | 88.5                      | 3      |
| Chlortoluron         | 87.1                     | 6      | 73.9                      | 5      | 78.0                      | 2      |
| Clothianidin         | 95.0                     | 9      | 83.2                      | 3      | 85.2                      | 3      |
| Coumaphos            | 73.7                     | 5      | 70.3                      | 4      | 73.1                      | 5      |
| Cyanofenphos         | 91.0                     | 2      | 105                       | 4      | 94.0                      | 4      |
| Cyazofamid           | 95.1                     | 1      | 93.3                      | 5      | 93.5                      | 3      |
| Cyproconazole        | 103                      | 2      | 95.4                      | 0.6    | 94.9                      | 2      |

|                      |      |    |      |     |      |     |
|----------------------|------|----|------|-----|------|-----|
| Dicrotophos          | 95.6 | 5  | 96.7 | 5   | 93.0 | 4   |
| Difenoconazole       | 92.7 | 5  | 97.1 | 2   | 90.5 | 0.5 |
| Dimethoate           | 80.7 | 9  | 81.0 | 10  | 80.3 | 5   |
| Dimethomorph         | 95.9 | 3  | 100  | 0.6 | 90.2 | 3   |
| Dimethyl phthalate   | 90.6 | 3  | 98.2 | 9   | 78.4 | 3   |
| Diniconazole         | 97.9 | 5  | 85.5 | 2   | 93.9 | 3   |
| Dinotefuran          | 83.6 | 2  | 93.7 | 2   | 87.0 | 2   |
| Emamectin Benzoate   | 88.6 | 1  | 82.9 | 4   | 81.8 | 6   |
| Epoxiconazol         | 108  | 7  | 95.5 | 1   | 93.8 | 4   |
| Ethiofencarb         | 71.0 | 2  | 94.5 | 9   | 90.9 | 11  |
| Ethofenprox          | 95.1 | 3  | 80.9 | 1   | 71.8 | 2   |
| Etoxazole            | 99.6 | 2  | 96.5 | 3   | 90.2 | 2   |
| Fenamiphos           | 96.4 | 6  | 101  | 2   | 101  | 3   |
| Fenamiphos sulfoxide | 77.0 | 3  | 93.7 | 6   | 92.0 | 5   |
| Fenbuconazole        | 108  | 12 | 108  | 2   | 90.2 | 5   |
| Fenpropathrin        | 101  | 3  | 92.0 | 9   | 97.6 | 12  |
| Fipronil             | 111  | 18 | 103  | 9   | 95.6 | 2   |
| Fipronil-sulfone     | 93.6 | 8  | 104  | 2   | 99.5 | 2   |
| Fludioxonil          | 84.4 | 7  | 82.8 | 4   | 78.5 | 6   |
| Fluopyram            | 99.8 | 6  | 107  | 3   | 100  | 1   |
| Fluoxastrobin        | 109  | 4  | 103  | 0.8 | 102  | 3   |
| Flusilazole          | 93.1 | 8  | 101  | 2   | 93.4 | 2   |
| Flutolanil           | 93.7 | 3  | 99.8 | 4   | 93.7 | 8   |
| Flutriafol           | 96.7 | 6  | 105  | 4   | 97.5 | 3   |
| Hexaconazole         | 96.7 | 8  | 99.3 | 1   | 99.1 | 5   |
| Hexaflumuron         | 96.9 | 4  | 103  | 3   | 101  | 0.9 |
| Hexazinone           | 87.3 | 6  | 97.2 | 10  | 86.7 | 2   |
| 3-Hydroxy-carbofuran | 91.0 | 18 | 88.9 | 10  | 70.7 | 3   |

|                 |      |     |      |     |      |     |
|-----------------|------|-----|------|-----|------|-----|
| Imazalil        | 92.4 | 4   | 94.6 | 1   | 82.9 | 4   |
| Imidacloprid    | 86.1 | 16  | 89.7 | 3   | 86.5 | 4   |
| Indoxacarb      | 100  | 5   | 107  | 5   | 92.8 | 8   |
| Ipconazole      | 97.5 | 4   | 90.7 | 2   | 83.6 | 7   |
| Isoprocarb      | 97.8 | 7   | 95.0 | 4   | 91.0 | 2   |
| Kresoxim-methyl | 112  | 6   | 101  | 8   | 91.0 | 11  |
| Lufenuron       | 87.1 | 9   | 80.6 | 11  | 77.8 | 3   |
| Machette        | 99.7 | 7   | 96.3 | 3   | 95.8 | 0.2 |
| Malaoxon        | 88.3 | 4   | 97.4 | 9   | 91.2 | 3   |
| Malathion       | 91.2 | 8   | 98.8 | 6   | 96.3 | 4   |
| Mepronil        | 87.2 | 2   | 94.0 | 3   | 87.4 | 3   |
| Metalaxyl       | 97.3 | 3   | 90.7 | 4   | 90.6 | 5   |
| Metalaxyl-M     | 94.1 | 1   | 93.8 | 4   | 91.3 | 4   |
| Methidathion    | 104  | 6   | 92.1 | 0.9 | 98.0 | 6   |
| Methomyl        | 95.6 | 4   | 91.0 | 0.7 | 90.1 | 1   |
| Methoprene      | 88.4 | 4   | 98.8 | 6   | 86.0 | 0.2 |
| Methoxyfenozide | 94.0 | 2   | 96.9 | 8   | 94.9 | 4   |
| Mevinphos       | 68.5 | 5   | 93.0 | 7   | 78.5 | 6   |
| Monocrotophos   | 105  | 9   | 90.8 | 2   | 90.2 | 0.7 |
| Myclobutanil    | 109  | 3   | 93.7 | 3   | 94.6 | 4   |
| Omethoate       | 85.7 | 3   | 86.3 | 2   | 84.3 | 4   |
| Paclobutrazol   | 93.5 | 2   | 97.8 | 2   | 96.7 | 2   |
| Penconazole     | 101  | 0.7 | 98.2 | 2   | 98.0 | 6   |
| Phenthoate      | 88.8 | 6   | 101  | 1   | 96.2 | 5   |
| Phorate         | 100  | 5   | 101  | 3   | 108  | 12  |
| Phorate sulfone | 99.7 | 4   | 99.4 | 8   | 95.7 | 1   |
| Phosalone       | 90.0 | 6   | 88.9 | 1   | 86.6 | 3   |
| Phosfolan       | 109  | 4   | 88.8 | 4   | 88.9 | 2   |

|                    |      |    |      |     |      |     |
|--------------------|------|----|------|-----|------|-----|
| Phosphamidon       | 93.7 | 11 | 90.4 | 1   | 89.5 | 8   |
| Piperonyl butoxide | 99.4 | 1  | 97.9 | 2   | 95.6 | 2   |
| Pirimicarb         | 95.7 | 8  | 96.7 | 3   | 98.3 | 1   |
| Pirimiphos-methyl  | 94.0 | 4  | 98.2 | 3   | 92.5 | 3   |
| Prochloraz         | 66.2 | 5  | 74.5 | 4   | 69.8 | 4   |
| Profenofos         | 94.9 | 7  | 96.9 | 6   | 96.1 | 6   |
| Propamocarb        | 76.7 | 2  | 75.3 | 6   | 72.1 | 0.1 |
| Propiconazole      | 97.6 | 2  | 99.7 | 5   | 94.1 | 1   |
| Pyraclostrobin     | 78.6 | 17 | 70.0 | 4   | 61.2 | 5   |
| Pyridaben          | 97.8 | 2  | 96.5 | 1   | 84.9 | 0.7 |
| Pyridafenthion     | 119  | 10 | 85.3 | 0.7 | 91.4 | 4   |
| Pyrimitate         | 97.6 | 4  | 95.7 | 3   | 89.8 | 6   |
| Pyrisoxazole       | 110  | 4  | 92.6 | 5   | 94.4 | 8   |
| Simeconazole       | 95.6 | 5  | 106  | 2   | 89.0 | 1   |
| Spirodiclofen      | 84.8 | 3  | 91.7 | 3   | 94.0 | 2   |
| Sulfotep           | 95.3 | 5  | 104  | 5   | 97.0 | 7   |
| Sulprofos          | 91.1 | 4  | 94.2 | 2   | 89.2 | 5   |
| Tebuconazole       | 85.2 | 5  | 92.0 | 4   | 96.5 | 4   |
| Tebufenozide       | 91.8 | 11 | 102  | 6   | 91.7 | 0.8 |
| Tebufenpyrad       | 107  | 3  | 97.9 | 3   | 93.6 | 3   |
| Temephos           | 96.6 | 5  | 93.6 | 4   | 91.7 | 2   |
| Terbufos           | 97.2 | 2  | 109  | 7   | 97.1 | 1   |
| Tetrachlorvinphos  | 95.4 | 10 | 97.9 | 3   | 92.5 | 1   |
| Tetraconazole      | 96.5 | 2  | 101  | 4   | 92.8 | 4   |
| Thiacloprid        | 83.4 | 7  | 93.0 | 8   | 77.7 | 6   |
| Thiamethoxam       | 93.7 | 6  | 92.6 | 4   | 83.7 | 5   |
| Thiophanate-methyl | 93.9 | 7  | 82.5 | 2   | 79.6 | 6   |
| Tolfenpyrad        | 88.8 | 7  | 83.1 | 6   | 76.8 | 5   |

|                 |      |     |      |     |      |   |
|-----------------|------|-----|------|-----|------|---|
| Triadimefon     | 101  | 7   | 106  | 2   | 101  | 5 |
| Triadimenol     | 112  | 0.9 | 95.8 | 5   | 96.0 | 3 |
| Trifloxystrobin | 109  | 7   | 98.8 | 1   | 93.3 | 7 |
| Triticonazole   | 108  | 17  | 98.1 | 1   | 90.7 | 5 |
| Uniconazole     | 101  | 2   | 94.7 | 0.4 | 93.6 | 4 |
| Vitavax         | 90.2 | 6   | 84.5 | 5   | 70.6 | 3 |

---



**Table S7 Recoveries of the pesticides at spiked concentrations of 30, 120, and 240  $\mu\text{g kg}^{-1}$  in the FU samples.**

| Spiked concentration<br>Pesticides | 30 $\mu\text{g kg}^{-1}$ |        | 120 $\mu\text{g kg}^{-1}$ |        | 240 $\mu\text{g kg}^{-1}$ |        |
|------------------------------------|--------------------------|--------|---------------------------|--------|---------------------------|--------|
|                                    | Recovery(%)              | RSD(%) | Recovery(%)               | RSD(%) | Recovery(%)               | RSD(%) |
| Acephate                           | 76.3                     | 0.7    | 88.1                      | 2      | 82.6                      | 2      |
| Acetamiprid                        | 75.2                     | 0.8    | 85.3                      | 2      | 80.3                      | 3      |
| Alachlor                           | 95.1                     | 3      | 99.4                      | 2      | 97.7                      | 1      |
| Atrazine                           | 97.6                     | 0.6    | 97.8                      | 2      | 96.9                      | 3      |
| Avermectin                         | 55.5                     | 19     | 69.6                      | 12     | 61.3                      | 3      |
| Azaconazole                        | 86.5                     | 4      | 102                       | 3      | 98.9                      | 1      |
| Azamethiphos                       | 79.0                     | 9      | 92.6                      | 1      | 84.0                      | 4      |
| Azoxystrobin                       | 89.6                     | 6      | 98.7                      | 2      | 91.0                      | 5      |
| Benalaxyl                          | 95.5                     | 4      | 118                       | 3      | 92.9                      | 1      |
| Bendiocarb                         | 101                      | 4      | 92.9                      | 3      | 103                       | 5      |
| Bitertanol                         | 79.5                     | 12     | 81.2                      | 7      | 87.8                      | 8      |
| Bromuconazole                      | 87.8                     | 6      | 99.3                      | 1      | 98.1                      | 4      |
| Buprofezin                         | 84.3                     | 2      | 92.1                      | 0.5    | 88.3                      | 5      |
| Cadusafos                          | 103                      | 4      | 111                       | 3      | 97.0                      | 6      |
| Carbendazim                        | 77.2                     | 6      | 57.3                      | 5      | 45.6                      | 5      |
| Carbofuran                         | 92.6                     | 10     | 97.2                      | 4      | 92.3                      | 2      |
| Chlorantraniliprole                | 66.9                     | 13     | 63.0                      | 1      | 68.2                      | 6      |
| Chlorpyrifos                       | 77.5                     | 2      | 85.4                      | 3      | 81.1                      | 5      |
| Chlortoluron                       | 62.4                     | 4      | 75.2                      | 2      | 73.7                      | 4      |
| Clothianidin                       | 76.7                     | 8      | 86.6                      | 2      | 86.2                      | 0.4    |
| Coumaphos                          | 35.5                     | 9      | 51.4                      | 7      | 48.7                      | 6      |
| Cyanofenphos                       | 109                      | 12     | 106                       | 1      | 97.5                      | 6      |
| Cyazofamid                         | 98.8                     | 8      | 98.4                      | 3      | 98.6                      | 2      |
| Cyproconazole                      | 95.6                     | 3      | 106                       | 3      | 98.0                      | 4      |

|                      |      |    |      |     |      |     |
|----------------------|------|----|------|-----|------|-----|
| Dicrotophos          | 93.3 | 3  | 96.5 | 2   | 96.7 | 2   |
| Difenoconazole       | 96.9 | 6  | 90.7 | 3   | 109  | 8   |
| Dimethoate           | 75.8 | 4  | 85.4 | 0.3 | 86.7 | 3   |
| Dimethomorph         | 91.0 | 2  | 97.5 | 4   | 96.1 | 1   |
| Dimethyl phthalate   | 88.6 | 3  | 82.2 | 6   | 101  | 5   |
| Diniconazole         | 95.5 | 6  | 79.3 | 3   | 103  | 9   |
| Dinotefuran          | 90.5 | 5  | 97.9 | 5   | 91.0 | 3   |
| Emamectin Benzoate   | 36.7 | 10 | 41.7 | 5   | 36.2 | 12  |
| Epoxiconazol         | 89.6 | 4  | 75.2 | 2   | 76.4 | 0.7 |
| Ethiofencarb         | 88.6 | 2  | 89.6 | 1   | 91.4 | 4   |
| Ethofenprox          | 47.5 | 7  | 52.9 | 2   | 53.7 | 12  |
| Etoxazole            | 89.5 | 1  | 98.1 | 2   | 95.1 | 3   |
| Fenamiphos           | 91.0 | 4  | 95.0 | 3   | 92.2 | 5   |
| Fenamiphos sulfoxide | 91.2 | 4  | 97.4 | 2   | 101  | 2   |
| Fenbuconazole        | 80.7 | 5  | 87.6 | 3   | 84.3 | 6   |
| Fenpropathrin        | 90.8 | 13 | 80.3 | 2   | 88.2 | 5   |
| Fipronil             | 171  | 21 | 94.4 | 1   | 91.3 | 1   |
| Fipronil-sulfone     | 90.0 | 3  | 109  | 1   | 94.8 | 2   |
| Fludioxonil          | 61.8 | 10 | 77.2 | 6   | 82.2 | 2   |
| Fluopyram            | 91.0 | 3  | 112  | 0.4 | 102  | 5   |
| Fluoxastrobin        | 92.4 | 6  | 119  | 2   | 101  | 4   |
| Flusilazole          | 95.9 | 6  | 105  | 4   | 104  | 0.9 |
| Flutolanil           | 95.3 | 6  | 118  | 3   | 99.2 | 1   |
| Flutriafol           | 94.4 | 8  | 94.3 | 2   | 103  | 5   |
| Hexaconazole         | 97.5 | 9  | 114  | 0.3 | 96.4 | 9   |
| Hexaflumuron         | 84.7 | 2  | 110  | 2   | 106  | 4   |
| Hexazinone           | 91.4 | 4  | 94.7 | 4   | 99.4 | 3   |
| 3-Hydroxy-carbofuran | 88.2 | 7  | 75.5 | 4   | 85.3 | 7   |

|                 |      |    |      |     |      |     |
|-----------------|------|----|------|-----|------|-----|
| Imazalil        | 67.8 | 8  | 80.0 | 8   | 71.9 | 2   |
| Imidacloprid    | 86.9 | 6  | 92.4 | 7   | 86.5 | 4   |
| Indoxacarb      | 88.3 | 6  | 116  | 3   | 104  | 6   |
| Ipconazole      | 69.2 | 5  | 87.3 | 6   | 81.4 | 3   |
| Isoprocarb      | 97.6 | 3  | 97.2 | 6   | 99.4 | 4   |
| Kresoxim-methyl | 78.0 | 4  | 103  | 1   | 107  | 5   |
| Lufenuron       | 34.3 | 5  | 49.5 | 2   | 55.0 | 12  |
| Machette        | 90.5 | 4  | 102  | 0.2 | 100  | 0.8 |
| Malaoxon        | 101  | 2  | 96.3 | 2   | 98.1 | 5   |
| Malathion       | 104  | 3  | 110  | 2   | 102  | 3   |
| Mepronil        | 82.7 | 4  | 96.6 | 4   | 97.3 | 1   |
| Metalaxyl       | 97.5 | 6  | 97.6 | 3   | 95.8 | 3   |
| Metalaxyl-M     | 93.2 | 5  | 99.7 | 2   | 98.5 | 3   |
| Methidathion    | 104  | 12 | 91.9 | 2   | 97.1 | 4   |
| Methomyl        | 72.3 | 9  | 85.6 | 2   | 83.5 | 5   |
| Methoprene      | 106  | 17 | 95.0 | 3   | 88.3 | 9   |
| Methoxyfenozide | 84.3 | 9  | 106  | 4   | 99.6 | 2   |
| Mevinphos       | 75.2 | 9  | 86.0 | 1   | 83.0 | 4   |
| Monocrotophos   | 92.5 | 6  | 88.1 | 1   | 96.1 | 4   |
| Myclobutanil    | 94.9 | 2  | 103  | 2   | 98.0 | 2   |
| Omethoate       | 85.0 | 3  | 96.5 | 2   | 88.3 | 2   |
| Paclobutrazol   | 96.4 | 5  | 110  | 7   | 93.6 | 0.9 |
| Penconazole     | 94.1 | 5  | 114  | 1   | 93.3 | 3   |
| Phenthoate      | 86.1 | 3  | 106  | 1   | 96.2 | 4   |
| Phorate         | 109  | 8  | 127  | 6   | 95.6 | 0.8 |
| Phorate sulfone | 81.3 | 3  | 99.2 | 3   | 100  | 2   |
| Phosalone       | 64.2 | 3  | 90.8 | 4   | 80.5 | 7   |
| Phosfolan       | 88.0 | 3  | 88.5 | 3   | 92.5 | 7   |

|                    |      |     |      |     |      |    |
|--------------------|------|-----|------|-----|------|----|
| Phosphamidon       | 92.4 | 8   | 96.6 | 7   | 91.9 | 6  |
| Piperonyl butoxide | 76.2 | 3   | 93.9 | 0.4 | 87.8 | 8  |
| Pirimicarb         | 87.9 | 1   | 92.8 | 4   | 99.3 | 3  |
| Pirimiphos-methyl  | 93.6 | 2   | 121  | 4   | 105  | 4  |
| Prochloraz         | 38.4 | 7   | 59.2 | 9   | 52.5 | 7  |
| Profenofos         | 80.5 | 5   | 85.7 | 3   | 84.3 | 3  |
| Propamocarb        | 65.1 | 4   | 70.8 | 3   | 66.6 | 1  |
| Propiconazole      | 87.3 | 6   | 115  | 2   | 92.1 | 3  |
| Pyraclostrobin     | 35.2 | 9   | 37.9 | 6   | 39.1 | 11 |
| Pyridaben          | 91.3 | 3   | 91.9 | 3   | 91.0 | 1  |
| Pyridafenthion     | 75.3 | 0.7 | 99.7 | 4   | 100  | 8  |
| Pyrimitate         | 94.9 | 5   | 97.9 | 2   | 95.4 | 4  |
| Pyrisoxazole       | 94.3 | 7   | 80.1 | 2   | 82.9 | 5  |
| Simeconazole       | 95.0 | 3   | 113  | 2   | 112  | 3  |
| Spirodiclofen      | 76.3 | 10  | 86.8 | 3   | 91.0 | 4  |
| Sulfotep           | 94.7 | 4   | 109  | 3   | 108  | 3  |
| Sulprofos          | 83.6 | 8   | 87.9 | 5   | 96.3 | 2  |
| Tebuconazole       | 91.2 | 5   | 97.8 | 2   | 77.1 | 6  |
| Tebufenozide       | 92.2 | 0.3 | 110  | 4   | 112  | 3  |
| Tebufenpyrad       | 87.3 | 1   | 95.4 | 3   | 96.4 | 4  |
| Temephos           | 68.6 | 3   | 75.7 | 6   | 79.3 | 6  |
| Terbufos           | 108  | 6   | 98.8 | 8   | 96.3 | 5  |
| Tetrachlorvinphos  | 86.8 | 2   | 99.6 | 3   | 95.1 | 2  |
| Tetraconazole      | 97.7 | 6   | 107  | 3   | 108  | 2  |
| Thiacloprid        | 70.8 | 7   | 81.0 | 2   | 78.7 | 4  |
| Thiamethoxam       | 82.4 | 3   | 85.6 | 3   | 84.6 | 2  |
| Thiophanate-methyl | 72.5 | 4   | 73.2 | 4   | 72.9 | 2  |
| Tolfenpyrad        | 46.1 | 13  | 52.0 | 6   | 59.8 | 11 |

|                 |      |   |      |   |      |     |
|-----------------|------|---|------|---|------|-----|
| Triadimefon     | 96.6 | 4 | 108  | 2 | 95.2 | 2   |
| Triadimenol     | 88.7 | 7 | 106  | 2 | 98.0 | 0.9 |
| Trifloxystrobin | 97.8 | 1 | 119  | 2 | 117  | 14  |
| Triticonazole   | 85.3 | 4 | 99.1 | 3 | 96.2 | 1   |
| Uniconazole     | 93.0 | 4 | 102  | 2 | 93.6 | 2   |
| Vitavax         | 77.3 | 5 | 78.4 | 3 | 92.2 | 0.5 |

---

**Table S8 Recoveries of the pesticides at spiked concentrations of 30, 120, and 240  $\mu\text{g kg}^{-1}$  in the FC samples.**

| Spiked concentration<br>Pesticides | 30 $\mu\text{g kg}^{-1}$ |        | 120 $\mu\text{g kg}^{-1}$ |        | 240 $\mu\text{g kg}^{-1}$ |        |
|------------------------------------|--------------------------|--------|---------------------------|--------|---------------------------|--------|
|                                    | Recovery(%)              | RSD(%) | Recovery(%)               | RSD(%) | Recovery(%)               | RSD(%) |
| Acephate                           | 76.6                     | 4      | 82.5                      | 2      | 88.3                      | 3      |
| Acetamiprid                        | 84.5                     | 6      | 87.0                      | 4      | 95.8                      | 3      |
| Alachlor                           | 106                      | 2      | 95.8                      | 3      | 97.2                      | 2      |
| Atrazine                           | 95.1                     | 8      | 97.1                      | 2      | 101                       | 5      |
| Avermectin                         | 83.0                     | 7      | 84.0                      | 12     | 77.5                      | 7      |
| Azaconazole                        | 93.7                     | 5      | 92.6                      | 1      | 97.8                      | 3      |
| Azamethiphos                       | 66.3                     | 5      | 92.5                      | 0.02   | 82.5                      | 2      |
| Azoxystrobin                       | 93.1                     | 4      | 95.2                      | 2      | 95.6                      | 4      |
| Benalaxyl                          | 94.8                     | 5      | 97.3                      | 0.6    | 102                       | 11     |
| Bendiocarb                         | 84.7                     | 9      | 92.2                      | 11     | 97.7                      | 2      |
| Bitertanol                         | 112                      | 10     | 91.8                      | 9      | 89.9                      | 8      |
| Bromuconazole                      | 78.6                     | 11     | 101                       | 5      | 94.8                      | 2      |
| Buprofezin                         | 93.3                     | 2      | 93.4                      | 2      | 90.5                      | 5      |
| Cadusafos                          | 103                      | 1      | 98.3                      | 2      | 96.5                      | 5      |
| Carbendazim                        | 18.7                     | 6      | 22.7                      | 3      | 21.7                      | 9      |
| Carbofuran                         | 78.8                     | 10     | 89.5                      | 5      | 101                       | 1      |
| Chlorantraniliprole                | 60.9                     | 11     | 64.5                      | 6      | 57.9                      | 5      |
| Chlorpyrifos                       | 77.0                     | 5      | 82.8                      | 3      | 84.0                      | 6      |
| Chlortoluron                       | 63.0                     | 3      | 63.5                      | 9      | 78.3                      | 0.3    |
| Clothianidin                       | 67.3                     | 6      | 83.1                      | 2      | 85.9                      | 4      |
| Coumaphos                          | 38.0                     | 9      | 38.3                      | 10     | 40.6                      | 9      |
| Cyanofenphos                       | 90.8                     | 4      | 97.2                      | 1      | 92.0                      | 1      |
| Cyazofamid                         | 116                      | 8      | 88.8                      | 3      | 93.1                      | 5      |
| Cyproconazole                      | 95.8                     | 4      | 95.4                      | 4      | 94.8                      | 3      |

|                      |      |     |      |     |      |     |
|----------------------|------|-----|------|-----|------|-----|
| Dicrotophos          | 93.2 | 7   | 96.5 | 0.9 | 96.9 | 2   |
| Difenoconazole       | 81.0 | 2   | 83.8 | 4   | 80.1 | 0.9 |
| Dimethoate           | 81.6 | 3   | 87.6 | 1   | 102  | 0.6 |
| Dimethomorph         | 93.0 | 0.5 | 93.4 | 4   | 90.8 | 2   |
| Dimethyl phthalate   | 90.8 | 9   | 90.8 | 3   | 89.0 | 4   |
| Diniconazole         | 77.5 | 7   | 78.1 | 3   | 74.0 | 0.3 |
| Dinotefuran          | 88.4 | 3   | 100  | 2   | 91.3 | 2   |
| Emamectin Benzoate   | 43.3 | 11  | 38.2 | 10  | 35.3 | 10  |
| Epoxiconazol         | 107  | 2   | 78.3 | 3   | 83.7 | 2   |
| Ethiofencarb         | 88.0 | 6   | 88.6 | 4   | 97.6 | 2   |
| Ethofenprox          | 62.9 | 11  | 56.4 | 9   | 87.5 | 10  |
| Etoxazole            | 90.7 | 1   | 90.3 | 0.9 | 95.0 | 2   |
| Fenamiphos           | 95.9 | 3   | 97.2 | 2   | 95.2 | 4   |
| Fenamiphos sulfoxide | 77.9 | 2   | 90.4 | 9   | 98.4 | 10  |
| Fenbuconazole        | 102  | 5   | 78.6 | 2   | 90.5 | 4   |
| Fenpropathrin        | 80.1 | 4   | 86.3 | 9   | 88.8 | 11  |
| Fipronil             | 152  | 22  | 95.5 | 6   | 99.3 | 2   |
| Fipronil-sulfone     | 94.9 | 0.8 | 103  | 1   | 97.9 | 0.6 |
| Fludioxonil          | 83.9 | 13  | 70.6 | 9   | 72.1 | 3   |
| Fluopyram            | 94.8 | 2   | 95.3 | 1   | 98.7 | 2   |
| Fluoxastrobin        | 92.9 | 7   | 101  | 1   | 95.3 | 3   |
| Flusilazole          | 93.7 | 6   | 96.1 | 2   | 93.8 | 2   |
| Flutolanil           | 90.4 | 0.9 | 96.7 | 3   | 101  | 2   |
| Flutriafol           | 88.7 | 10  | 91.0 | 5   | 96.2 | 4   |
| Hexaconazole         | 100  | 1   | 98.1 | 4   | 97.4 | 6   |
| Hexaflumuron         | 91.6 | 1   | 94.8 | 2   | 94.0 | 0.9 |
| Hexazinone           | 76.7 | 4   | 89.3 | 2   | 96.0 | 3   |
| 3-Hydroxy-carbofuran | 78.9 | 3   | 85.2 | 2   | 106  | 11  |

|                 |      |     |      |     |      |      |
|-----------------|------|-----|------|-----|------|------|
| Imazalil        | 71.8 | 2   | 81.3 | 5   | 74.5 | 4    |
| Imidacloprid    | 70.1 | 11  | 93.5 | 6   | 86.2 | 4    |
| Indoxacarb      | 82.0 | 5   | 103  | 9   | 97.9 | 2    |
| Ipconazole      | 72.6 | 6   | 78.5 | 1   | 84.0 | 2    |
| Isoprocarb      | 97.2 | 2   | 89.4 | 3   | 98.2 | 3    |
| Kresoxim-methyl | 100  | 7   | 97.4 | 4   | 102  | 0.5  |
| Lufenuron       | 37.3 | 3   | 44.3 | 10  | 47.4 | 13   |
| Machette        | 96.6 | 0.4 | 96.4 | 2   | 98.5 | 2    |
| Malaoxon        | 92.6 | 4   | 98.7 | 3   | 101  | 8    |
| Malathion       | 96.7 | 4   | 94.2 | 2   | 95.7 | 3    |
| Mepronil        | 80.2 | 2   | 80.9 | 2   | 95.4 | 0.7  |
| Metalaxyl       | 88.0 | 5   | 101  | 3   | 95.9 | 4    |
| Metalaxyl-M     | 87.9 | 3   | 97.5 | 2   | 96.6 | 0.7  |
| Methidathion    | 88.4 | 11  | 80.4 | 0.6 | 93.0 | 5    |
| Methomyl        | 89.4 | 4   | 95.0 | 4   | 99.5 | 2    |
| Methoprene      | 89.1 | 10  | 91.2 | 5   | 97.4 | 5    |
| Methoxyfenozide | 94.3 | 4   | 91.4 | 3   | 97.5 | 5    |
| Mevinphos       | 88.2 | 6   | 88.7 | 8   | 94.1 | 6    |
| Monocrotophos   | 94.6 | 3   | 95.8 | 4   | 97.9 | 0.03 |
| Myclobutanil    | 102  | 3   | 98.5 | 7   | 107  | 4    |
| Omethoate       | 78.0 | 4   | 92.1 | 4   | 92.9 | 2    |
| Paclobutrazol   | 95.2 | 1   | 98.1 | 1   | 99.3 | 4    |
| Penconazole     | 93.2 | 8   | 97.1 | 0.7 | 93.2 | 6    |
| Phenthoate      | 96.1 | 6   | 99.9 | 2   | 98.5 | 4    |
| Phorate         | 71.4 | 3   | 105  | 4   | 101  | 0.9  |
| Phorate sulfone | 98.8 | 6   | 95.2 | 2   | 105  | 7    |
| Phosalone       | 72.2 | 4   | 71.8 | 6   | 72.9 | 7    |
| Phosfolan       | 89.6 | 8   | 95.2 | 7   | 97.9 | 2    |



|                    |      |     |      |     |      |   |
|--------------------|------|-----|------|-----|------|---|
| Phosphamidon       | 93.6 | 7   | 98.5 | 6   | 104  | 5 |
| Piperonyl butoxide | 91.1 | 1   | 85.4 | 2   | 86.9 | 3 |
| Pirimicarb         | 92.7 | 6   | 89.5 | 2   | 99.5 | 1 |
| Pirimiphos-methyl  | 93.8 | 2   | 97.8 | 3   | 98.5 | 2 |
| Prochloraz         | 42.7 | 10  | 50.6 | 12  | 46.6 | 3 |
| Profenofos         | 82.9 | 0.6 | 88.5 | 3   | 82.7 | 4 |
| Propamocarb        | 62.5 | 0.5 | 78.6 | 1   | 76.4 | 3 |
| Propiconazole      | 98.8 | 2   | 91.7 | 3   | 94.7 | 2 |
| Pyraclostrobin     | 34.4 | 2   | 30.8 | 8   | 34.8 | 7 |
| Pyridaben          | 90.0 | 2   | 93.8 | 1   | 95.9 | 9 |
| Pyridafenthion     | 89.9 | 8   | 86.1 | 1   | 91.6 | 3 |
| Pyrimitate         | 94.0 | 2   | 92.6 | 1   | 98.9 | 4 |
| Pyrisoxazole       | 83.3 | 9   | 72.4 | 3   | 74.0 | 4 |
| Simeconazole       | 108  | 7   | 98.0 | 3   | 103  | 2 |
| Spirodiclofen      | 92.9 | 7   | 90.5 | 2   | 97.8 | 3 |
| Sulfotep           | 96.2 | 1   | 103  | 1   | 101  | 3 |
| Sulprofos          | 86.4 | 3   | 87.0 | 3   | 98.7 | 7 |
| Tebuconazole       | 92.4 | 7   | 90.7 | 1   | 88.0 | 4 |
| Tebufenozide       | 99.2 | 8   | 106  | 8   | 93.2 | 1 |
| Tebufenpyrad       | 89.2 | 7   | 92.5 | 6   | 96.4 | 4 |
| Temephos           | 78.5 | 5   | 73.5 | 2   | 76.3 | 7 |
| Terbufos           | 109  | 4   | 99.1 | 10  | 98.4 | 2 |
| Tetrachlorvinphos  | 102  | 8   | 99.9 | 5   | 95.1 | 1 |
| Tetraconazole      | 100  | 6   | 98.7 | 0.4 | 105  | 2 |
| Thiacloprid        | 79.0 | 1   | 87.1 | 3   | 96.7 | 5 |
| Thiamethoxam       | 96.0 | 3   | 97.9 | 2   | 96.2 | 2 |
| Thiophanate-methyl | 67.8 | 3   | 70.3 | 5   | 90.8 | 5 |
| Tolfenpyrad        | 59.1 | 12  | 57.0 | 14  | 54.4 | 8 |

|                 |      |   |      |   |      |   |
|-----------------|------|---|------|---|------|---|
| Triadimefon     | 108  | 4 | 99.1 | 2 | 96.5 | 3 |
| Triadimenol     | 92.3 | 3 | 103  | 5 | 104  | 4 |
| Trifloxystrobin | 91.9 | 1 | 96.5 | 2 | 98.0 | 4 |
| Triticonazole   | 96.5 | 7 | 96.2 | 4 | 96.1 | 1 |
| Uniconazole     | 92.4 | 2 | 94.0 | 2 | 93.6 | 3 |
| Vitavax         | 69.6 | 4 | 79.1 | 3 | 86.4 | 6 |

---

**Table S9 Recoveries of the pesticides at spiked concentrations of 30, 120, and 240  $\mu\text{g kg}^{-1}$  in the FD samples.**

| Spiked concentration | 30 $\mu\text{g kg}^{-1}$ |             | 120 $\mu\text{g kg}^{-1}$ |             | 240 $\mu\text{g kg}^{-1}$ |             |
|----------------------|--------------------------|-------------|---------------------------|-------------|---------------------------|-------------|
|                      | Pesticides               | Recovery(%) | RSD(%)                    | Recovery(%) | RSD(%)                    | Recovery(%) |
| Acephate             | 74.6                     | 3           | 82.6                      | 5           | 86.4                      | 2           |
| Acetamiprid          | 92.6                     | 4           | 87.0                      | 4           | 78.9                      | 6           |
| Alachlor             | 97.0                     | 0.9         | 94.4                      | 0.4         | 94.3                      | 1           |
| Atrazine             | 110                      | 4           | 93.7                      | 1           | 89.4                      | 3           |
| Avermectin           | 89.6                     | 13          | 68.9                      | 8           | 73.4                      | 0.9         |
| Azaconazole          | 94.3                     | 8           | 95.6                      | 1           | 96.4                      | 2           |
| Azamethiphos         | 84.7                     | 0.2         | 87.2                      | 9           | 62.6                      | 6           |
| Azoxystrobin         | 92.5                     | 5           | 91.8                      | 6           | 88.2                      | 0.7         |
| Benalaxyl            | 96.5                     | 4           | 94.1                      | 3           | 98.0                      | 8           |
| Bendiocarb           | 96.0                     | 9           | 77.8                      | 3           | 72.9                      | 5           |
| Bitertanol           | 114                      | 11          | 93.5                      | 4           | 91.9                      | 4           |
| Bromuconazole        | 100                      | 8           | 90.3                      | 2           | 88.8                      | 6           |
| Buprofezin           | 95.9                     | 3           | 97.6                      | 0.7         | 91.5                      | 3           |
| Cadusafos            | 103                      | 3           | 94.6                      | 0.3         | 93.5                      | 6           |
| Carbendazim          | 31.5                     | 3           | 27.9                      | 9           | 28.9                      | 6           |
| Carbofuran           | 98.8                     | 7           | 81.9                      | 8           | 77.8                      | 5           |
| Chlorantraniliprole  | 86.4                     | 11          | 62.7                      | 3           | 80.0                      | 7           |
| Chlorpyrifos         | 93.4                     | 1           | 86.6                      | 4           | 87.1                      | 3           |
| Chlortoluron         | 78.7                     | 5           | 71.7                      | 5           | 71.3                      | 3           |
| Clothianidin         | 96.5                     | 10          | 88.9                      | 0.7         | 91.3                      | 6           |
| Coumaphos            | 47.3                     | 4           | 49.3                      | 8           | 56.7                      | 2           |
| Cyanofenphos         | 98.2                     | 5           | 96.3                      | 6           | 99.5                      | 7           |
| Cyazofamid           | 91.6                     | 17          | 85.5                      | 2           | 97.9                      | 7           |
| Cyproconazole        | 104                      | 4           | 95.6                      | 2           | 94.5                      | 3           |

|                      |      |     |      |     |      |     |
|----------------------|------|-----|------|-----|------|-----|
| Dicrotophos          | 93.5 | 4   | 103  | 1   | 95.9 | 2   |
| Difenoconazole       | 82.1 | 5   | 82.1 | 6   | 80.4 | 6   |
| Dimethoate           | 95.2 | 5   | 84.9 | 2   | 85.0 | 1   |
| Dimethomorph         | 92.6 | 4   | 94.4 | 2   | 95.0 | 5   |
| Dimethyl phthalate   | 86.0 | 10  | 74.5 | 3   | 66.3 | 9   |
| Diniconazole         | 91.6 | 6   | 80.0 | 8   | 81.0 | 6   |
| Dinotefuran          | 94.8 | 4   | 95.2 | 3   | 94.7 | 2   |
| Emamectin Benzoate   | 49.9 | 2   | 37.8 | 11  | 50.9 | 7   |
| Epoxiconazol         | 100  | 3   | 82.1 | 1   | 83.3 | 6   |
| Ethiofencarb         | 98.5 | 10  | 84.1 | 4   | 94.1 | 9   |
| Ethofenprox          | 72.9 | 0.9 | 60.1 | 4   | 64.6 | 4   |
| Etoxazole            | 91.3 | 5   | 92.2 | 3   | 96.0 | 1   |
| Fenamiphos           | 96.2 | 8   | 94.9 | 4   | 96.6 | 6   |
| Fenamiphos sulfoxide | 102  | 10  | 83.2 | 4   | 70.4 | 2   |
| Fenbuconazole        | 90.8 | 9   | 82.5 | 2   | 82.4 | 6   |
| Fenpropathrin        | 97.2 | 4   | 90.8 | 8   | 88.5 | 4   |
| Fipronil             | 98.4 | 16  | 99.8 | 6   | 77.3 | 11  |
| Fipronil-sulfone     | 99.6 | 2   | 102  | 0.9 | 93.1 | 0.8 |
| Fludioxonil          | 63.3 | 11  | 76.8 | 2   | 80.8 | 9   |
| Fluopyram            | 99.8 | 2   | 98.5 | 3   | 99.8 | 2   |
| Fluoxastrobin        | 95.3 | 9   | 96.7 | 3   | 97.6 | 2   |
| Flusilazole          | 94.2 | 8   | 97.3 | 4   | 96.8 | 3   |
| Flutolanil           | 97.9 | 6   | 94.5 | 2   | 97.3 | 4   |
| Flutriafol           | 113  | 6   | 91.7 | 5   | 93.1 | 4   |
| Hexaconazole         | 98.9 | 6   | 91.6 | 1   | 96.9 | 5   |
| Hexaflumuron         | 98.2 | 5   | 97.8 | 3   | 99.5 | 2   |
| Hexazinone           | 90.0 | 7   | 76.8 | 6   | 73.6 | 4   |
| 3-Hydroxy-carbofuran | 95.0 | 19  | 95.0 | 1   | 88.3 | 7   |

|                 |      |     |      |     |      |     |
|-----------------|------|-----|------|-----|------|-----|
| Imazalil        | 65.6 | 4   | 76.9 | 5   | 79.2 | 0.9 |
| Imidacloprid    | 99.8 | 9   | 93.2 | 0.4 | 89.4 | 2   |
| Indoxacarb      | 117  | 6   | 98.5 | 3   | 92.0 | 8   |
| Ipconazole      | 87.4 | 3   | 77.6 | 2   | 82.9 | 7   |
| Isoprocarb      | 106  | 5   | 102  | 3   | 91.7 | 3   |
| Kresoxim-methyl | 104  | 7   | 90.9 | 0.2 | 96.3 | 0.8 |
| Lufenuron       | 64.2 | 7   | 52.1 | 4   | 70.6 | 1   |
| Machette        | 97.5 | 2   | 97.6 | 0.3 | 95.2 | 2   |
| Malaoxon        | 92.6 | 8   | 72.1 | 3   | 71.5 | 8   |
| Malathion       | 98.8 | 3   | 96.0 | 1   | 96.8 | 5   |
| Mepronil        | 87.8 | 4   | 83.3 | 2   | 94.5 | 0.8 |
| Metalaxyl       | 103  | 4   | 98.8 | 3   | 97.9 | 7   |
| Metalaxyl-M     | 111  | 3   | 97.7 | 3   | 94.1 | 2   |
| Methidathion    | 108  | 0.5 | 92.2 | 4   | 93.9 | 6   |
| Methomyl        | 93.0 | 4   | 101  | 1   | 89.9 | 2   |
| Methoprene      | 103  | 2   | 91.2 | 5   | 91.8 | 3   |
| Methoxyfenozide | 97.9 | 8   | 94.5 | 3   | 100  | 6   |
| Mevinphos       | 94.8 | 13  | 92.4 | 6   | 83.8 | 7   |
| Monocrotophos   | 95.1 | 5   | 82.9 | 5   | 93.9 | 0.4 |
| Myclobutanil    | 105  | 9   | 97.4 | 1   | 95.3 | 7   |
| Omethoate       | 86.5 | 5   | 89.6 | 2   | 89.2 | 2   |
| Paclobutrazol   | 109  | 3   | 95.0 | 5   | 97.2 | 3   |
| Penconazole     | 91.1 | 5   | 96.4 | 5   | 93.2 | 4   |
| Phenthoate      | 108  | 7   | 101  | 4   | 95.8 | 4   |
| Phorate         | 91.7 | 5   | 95.3 | 2   | 94.5 | 7   |
| Phorate sulfone | 110  | 6   | 90.3 | 1   | 99.9 | 4   |
| Phosalone       | 75.1 | 5   | 73.3 | 2   | 78.5 | 6   |
| Phosfolan       | 99.1 | 4   | 88.9 | 2   | 78.6 | 2   |

|                    |      |     |      |     |      |     |
|--------------------|------|-----|------|-----|------|-----|
| Phosphamidon       | 84.2 | 3   | 91.1 | 3   | 91.1 | 4   |
| Piperonyl butoxide | 97.6 | 5   | 93.4 | 3   | 91.3 | 3   |
| Pirimicarb         | 93.8 | 8   | 92.3 | 6   | 89.7 | 3   |
| Pirimiphos-methyl  | 95.0 | 7   | 96.8 | 3   | 91.3 | 4   |
| Prochloraz         | 60.4 | 0.6 | 51.9 | 4   | 59.2 | 5   |
| Profenofos         | 94.4 | 0.6 | 83.9 | 4   | 90.8 | 3   |
| Propamocarb        | 63.8 | 5   | 70.6 | 8   | 70.1 | 0.6 |
| Propiconazole      | 94.8 | 4   | 95.9 | 2   | 93.0 | 2   |
| Pyraclostrobin     | 48.4 | 5   | 40.6 | 3   | 51.8 | 1   |
| Pyridaben          | 95.5 | 2   | 92.0 | 2   | 90.2 | 3   |
| Pyridafenthion     | 87.1 | 7   | 90.5 | 4   | 97.8 | 4   |
| Pyrimitate         | 98.8 | 5   | 98.9 | 2   | 96.8 | 2   |
| Pyrisoxazole       | 81.9 | 15  | 81.0 | 4   | 79.7 | 3   |
| Simeconazole       | 94.7 | 0.5 | 96.6 | 5   | 98.6 | 2   |
| Spirodiclofen      | 83.3 | 3   | 90.3 | 4   | 98.9 | 1   |
| Sulfotep           | 118  | 2   | 98.6 | 0.5 | 95.9 | 2   |
| Sulprofos          | 91.8 | 5   | 86.3 | 2   | 96.1 | 4   |
| Tebuconazole       | 91.7 | 2   | 91.7 | 4   | 88.7 | 8   |
| Tebufenozide       | 108  | 9   | 95.9 | 0.8 | 97.8 | 4   |
| Tebufenpyrad       | 98.0 | 6   | 92.0 | 3   | 92.8 | 2   |
| Temephos           | 87.7 | 3   | 76.7 | 2   | 83.8 | 3   |
| Terbufos           | 95.7 | 7   | 88.9 | 4   | 93.3 | 5   |
| Tetrachlorvinphos  | 106  | 10  | 97.0 | 0.7 | 94.5 | 8   |
| Tetraconazole      | 106  | 1   | 106  | 2   | 94.3 | 3   |
| Thiacloprid        | 86.3 | 4   | 80.9 | 2   | 78.2 | 0.8 |
| Thiamethoxam       | 104  | 2   | 97.7 | 2   | 94.3 | 3   |
| Thiophanate-methyl | 74.9 | 3   | 62.7 | 2   | 61.1 | 3   |
| Tolfenpyrad        | 70.0 | 0.7 | 63.2 | 4   | 68.0 | 1   |

|                 |      |    |      |   |      |   |
|-----------------|------|----|------|---|------|---|
| Triadimefon     | 102  | 11 | 94.0 | 2 | 94.8 | 8 |
| Triadimenol     | 100  | 12 | 95.2 | 3 | 95.7 | 2 |
| Trifloxystrobin | 104  | 3  | 98.6 | 1 | 91.3 | 4 |
| Triticonazole   | 110  | 17 | 99.4 | 6 | 97.5 | 5 |
| Uniconazole     | 106  | 2  | 92.2 | 3 | 91.4 | 5 |
| Vitavax         | 90.7 | 6  | 70.4 | 5 | 83.5 | 3 |

---

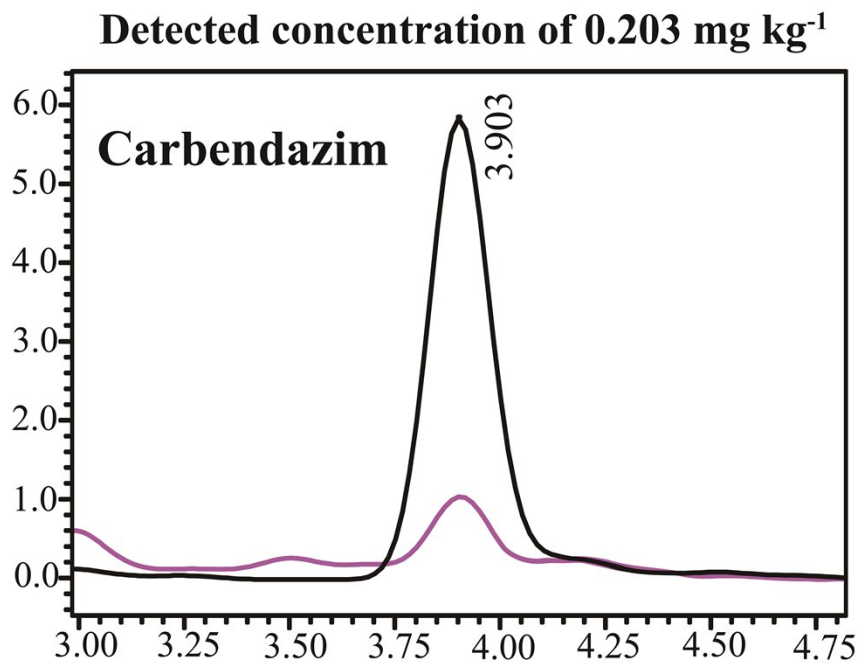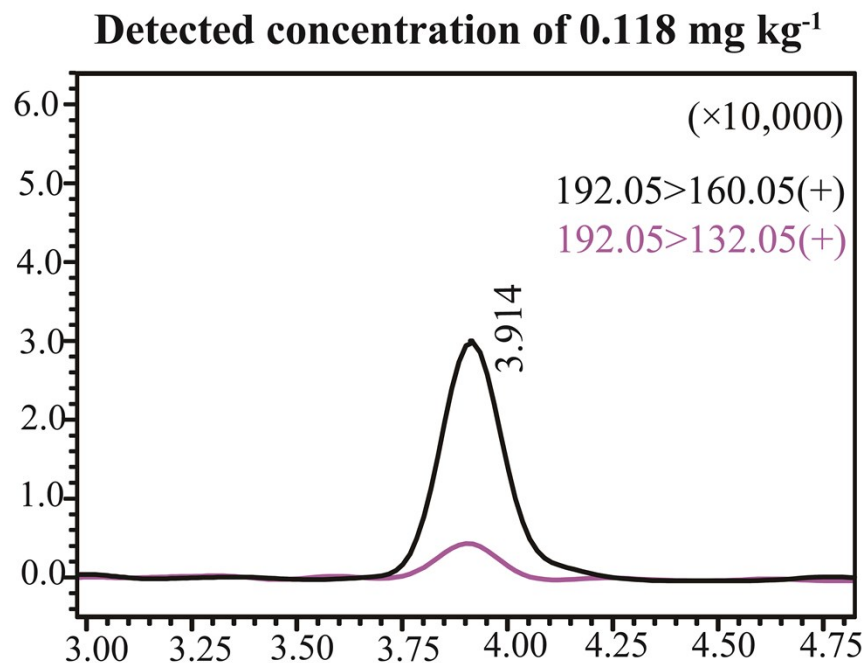

**Fig. S1** LC-MS/MS chromatograms of detected carbendazim at concentrations exceeding the EU MRLs in two real samples.
